# Supplementary material for: Selective conversion of methane to methanol facilitated by molecular metal–methoxy complexes via a self-correcting chemical cycle
Source: Royal Society of Chemistry journal article supplement (doi:10.1039/d4cp02189d), 2024-01-01
Supplement: d4cp02189d1.pdf [file d4cp02189d1.pdf]

Electronic Supplementary Information

**Selective conversion of methane to methanol facilitated by  
metal-methoxy molecular complexes via  
a self-correcting chemical cycle**

Shahriar N. Khan, Brody Quebedeaux, and Evangelos Miliordos\*

*Department of Chemistry and Biochemistry, Auburn University, Auburn, AL 36849-  
5312, USA*

\*[emiliord@auburn.edu](mailto:emiliord@auburn.edu)

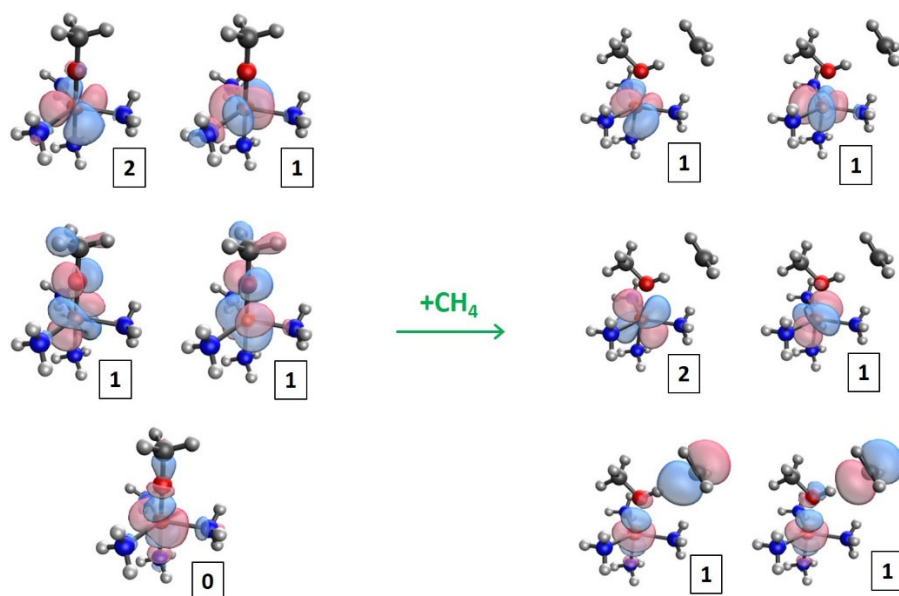

**Figure S1.** Molecular orbitals before and after the PCET process occurring during the  $(\text{NH}_3)_4\text{FeOCH}_3^{2+}$  ( $S=3/2$ ) +  $\text{CH}_4$  reaction. The numbers in the boxes indicate the occupancy of each orbital. An electron pair of oxygen captures a  $\text{H}^+$  from methane, and the two electrons of the cleaved CH bond populate the two bottom right orbitals. These orbitals are a linear combination of the  $3d_z^2$  orbital of iron and the orbital of the methyl radical.

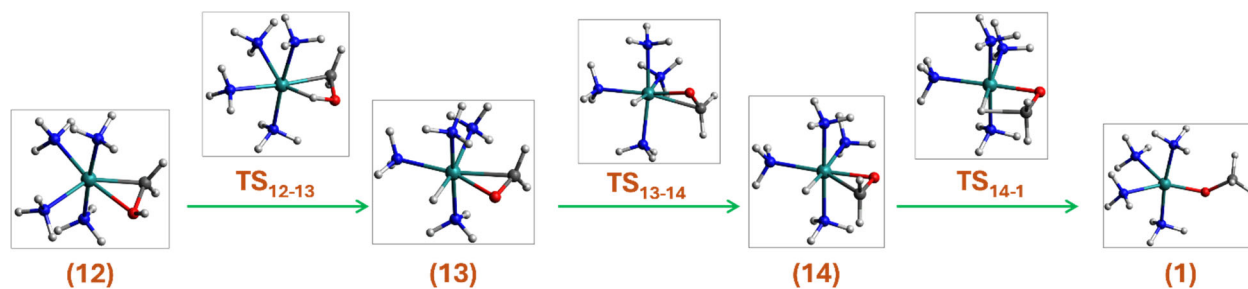

**Figure S2.** Isomerization mechanism from  $(\text{NH}_3)_4\text{RuCH}_2\text{OH}^{2+}$  ( $(\text{NH}_3)_4\text{RuOCH}_3^{2+}$  ( $S=1/2$ ): The hydrogen atom of the OH group migrates first to Ru ( $\text{TS}_{12-13}$ , rate determining step; see Figure S3), the  $\text{CH}_2\text{O}$  group rotates to bring the hydrogen close to carbon ( $\text{TS}_{13-14}$ ), and finally the hydrogen is transferred to carbon ( $\text{TS}_{14-1}$ ) to form (1).

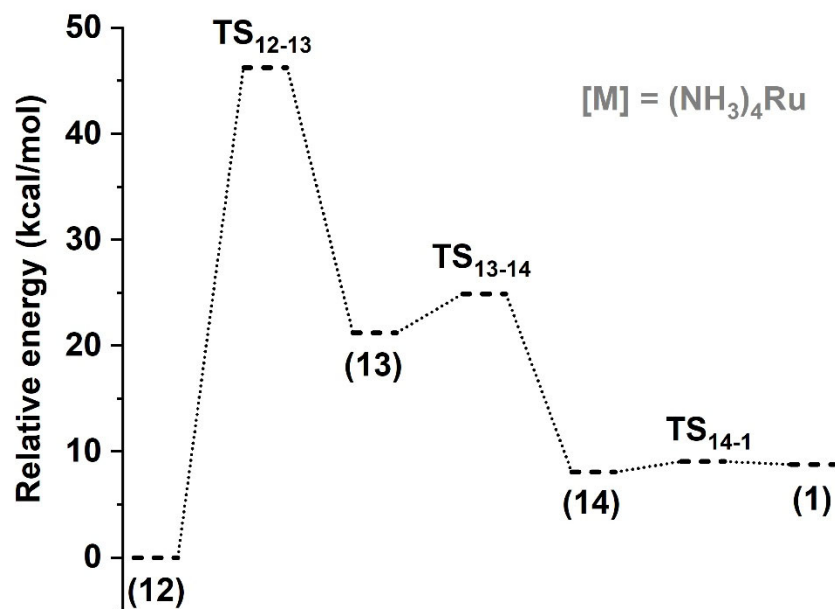

**Figure S3.** MN15 electronic energy diagram for the isomerization mechanism from  $(\text{NH}_3)_4\text{RuCH}_2\text{OH}^{2+}$  to  $(\text{NH}_3)_4\text{RuOCH}_3^{2+}$  ( $S=1/2$ ); see Figure S2 for structures and more details of the mechanism.

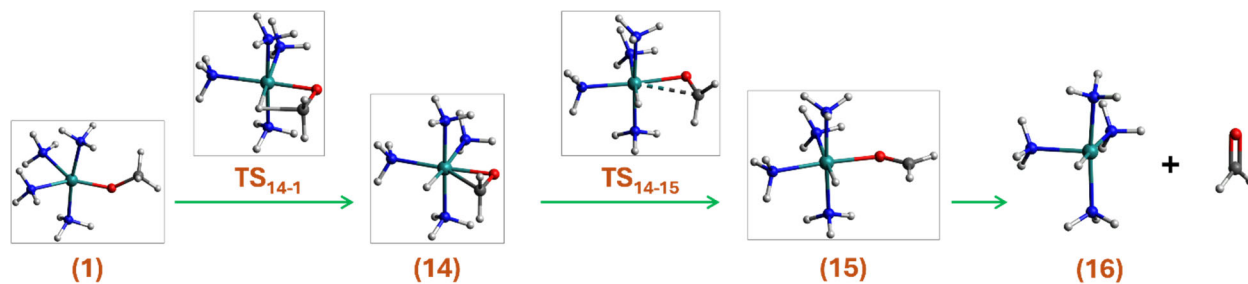

**Figure S4.** Mechanism for the  $\beta$ -hydrogen elimination from  $(\text{NH}_3)_4\text{RuOCH}_3^{2+}$  ( $S=1/2$ ): The hydrogen atom of the methyl group migrates first to Ru ( $\text{TS}_{14-1}$ ) and the formed  $\text{CH}_2\text{O}$  group gradually detaches (via  $\text{TS}_{14-15}$ ). Structures (1) and (14) are in a fast equilibrium, while the detachment of formaldehyde is not a favorable process; see Figure S5 for the energy diagram.

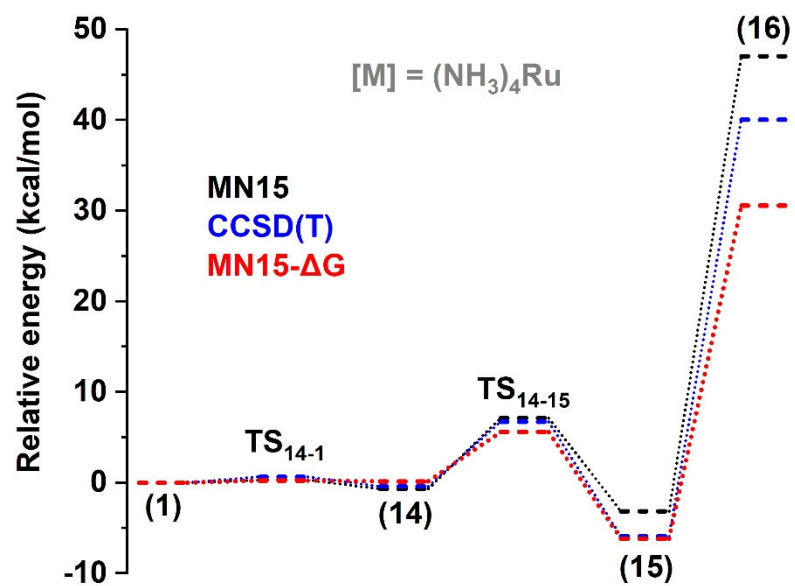

**Figure S5.** MN15 Electronic energy diagram for the  $\beta$ -hydrogen elimination from  $(\text{NH}_3)_4\text{RuOCH}_3^{2+}$  ( $S=1/2$ ); see Figure S4 for structures and more details of the mechanism. The CCSD(T) energies are obtained with the MN15 optimized structures.

**Table S1.** Energy values (kcal/mol) for the diagrams of Figures 3, 5, 6, 7, 8, S3 and S5.

| Species                                | PCET                                     |                              |                              | 2+2                                      |                              |                               |
|----------------------------------------|------------------------------------------|------------------------------|------------------------------|------------------------------------------|------------------------------|-------------------------------|
|                                        | S = 1/2                                  | S = 3/2                      | S = 5/2                      | S = 1/2                                  | S = 3/2                      | S = 5/2                       |
| <b>Figure 3</b>                        |                                          |                              |                              |                                          |                              |                               |
| (1)+CH <sub>4</sub>                    | 11.72                                    | 1.52                         | 0.00                         | 11.72                                    | 1.52                         |                               |
| (2)                                    | 6.13                                     | -6.08                        | -6.68                        | 3.93                                     | -5.90                        |                               |
| TS <sub>2-3</sub> /TS <sub>2-6</sub>   | 31.89                                    | 19.89                        | 21.94                        | 26.68                                    | 31.08                        |                               |
| (3)/(6)                                | 15.82                                    | 4.55                         | 4.67                         | -3.77                                    | -9.90                        |                               |
| [M]CH <sub>3</sub> +CH <sub>3</sub> OH |                                          |                              |                              | 34.63                                    | 16.06                        |                               |
| <b>Figure 5</b>                        |                                          |                              |                              |                                          |                              |                               |
| (1)+CH <sub>3</sub> OH                 | 11.72                                    | 1.52                         | 0.00                         | 11.72                                    | 1.52                         |                               |
| (7)/(10)                               | -21.63                                   | -26.83                       | -29.06                       | -11.12                                   | -21.54                       |                               |
| TS <sub>7-8</sub> /TS <sub>10-11</sub> | 12.79                                    | 3.78                         | 5.15                         | 17.43                                    | 24.38                        |                               |
| (8)/(11)                               | -5.13                                    | -16.94                       | -15.64                       | -16.90                                   | -22.29                       |                               |
| TS <sub>8-9</sub>                      | 33.10                                    | 21.97                        | 24.05                        |                                          |                              |                               |
| (9)                                    | -22.69                                   | -26.55                       | -28.80                       |                                          |                              |                               |
| (1)+CH <sub>3</sub> OH                 | 11.72                                    | 1.52                         | 0.00                         |                                          |                              |                               |
| <b>Figure 6</b>                        |                                          |                              |                              |                                          |                              |                               |
| (1)+CH <sub>4</sub>                    | 0.00                                     | 12.76                        | 54.84                        | 0.00                                     | 12.76                        |                               |
| (2)                                    | -14.92                                   | 9.10                         | 48.73                        | -14.92                                   | 6.29                         |                               |
| TS <sub>2-3</sub> /TS <sub>2-6</sub>   | 30.21                                    | 43.45                        | 80.21                        | 8.83                                     | 54.63                        |                               |
| (3)/(6)                                | 17.84                                    | 30.19                        | 63.08                        | -20.67                                   | 19.16                        |                               |
| [M]CH <sub>3</sub> +CH <sub>3</sub> OH |                                          |                              |                              | 8.32                                     | 35.89                        |                               |
| <b>Figure 7</b>                        |                                          |                              |                              |                                          |                              |                               |
| (1)+CH <sub>3</sub> OH                 | 0.00                                     | 12.76                        |                              | 0.00                                     |                              |                               |
| (7)/(10)                               | -43.72                                   | -6.79                        |                              | -27.89                                   |                              |                               |
| TS <sub>7-8</sub> /TS <sub>10-11</sub> | -3.45                                    | 25.48                        |                              | 0.58                                     |                              |                               |
| (8)/(11)                               | -17.83                                   | 10.31                        |                              | -34.24                                   |                              |                               |
| TS <sub>8-9</sub>                      | 20.30                                    | 43.11                        |                              | 12.01                                    |                              |                               |
| (9)                                    | -43.62                                   | 10.97                        |                              | -25.45                                   |                              |                               |
| (1)+CH <sub>3</sub> OH                 | 0.00                                     | 12.76                        |                              | 0.00                                     |                              |                               |
| <b>Figure 8</b>                        |                                          |                              |                              |                                          |                              |                               |
|                                        | [M] = (NH <sub>3</sub> ) <sub>4</sub> Fe |                              |                              | [M] = (NH <sub>3</sub> ) <sub>4</sub> Ru |                              |                               |
|                                        | S = 1/2<br>(O <sub>3</sub> )             | S = 3/2<br>(O <sub>3</sub> ) | S = 5/2<br>(O <sub>3</sub> ) | S = 1/2<br>(O <sub>3</sub> )             | S = 3/2<br>(O <sub>3</sub> ) | S = 1/2<br>(N <sub>2</sub> O) |
| [M]CH <sub>3</sub> +O <sub>3</sub>     | 18.56                                    | 0.00                         | 18.18                        | 0.00                                     | 27.57                        | 0.00                          |
| (4)                                    | 17.29                                    | -12.48                       | -5.63                        | -34.67                                   | -22.80                       | -8.41                         |
| TS <sub>4-5</sub>                      | -7.76                                    | -10.25                       | -5.51                        | -34.52                                   | -22.68                       | 15.71                         |
| (5)                                    | -8.34                                    | -19.51                       | -26.83                       | -62.96                                   | -62.90                       | -37.12                        |
| [M](O)CH <sub>3</sub> +O <sub>2</sub>  | -22.67                                   | -22.67                       | -22.67                       | -58.06                                   | -58.06                       | -31.47                        |
| TS <sub>5-1</sub> +O <sub>2</sub>      | -19.32                                   | -19.32                       | -19.32                       | -39.17                                   | -39.17                       | -12.57                        |
| (1)+O <sub>2</sub>                     | -89.49                                   | -89.49                       | -89.49                       | -83.27                                   | -83.27                       | -56.68                        |
| <b>Figure S3</b>                       |                                          |                              |                              |                                          |                              |                               |
| (12)                                   | 0.00                                     |                              |                              |                                          |                              |                               |

|                     |       |         |                        |  |  |  |
|---------------------|-------|---------|------------------------|--|--|--|
| TS <sub>12-13</sub> | 46.25 |         |                        |  |  |  |
| (13)                | 21.24 |         |                        |  |  |  |
| TS <sub>13-14</sub> | 24.89 |         |                        |  |  |  |
| (14)                | 8.09  |         |                        |  |  |  |
| TS <sub>14-1</sub>  | 9.07  |         |                        |  |  |  |
| (1)                 | 8.78  |         |                        |  |  |  |
| <b>Figure S5</b>    |       |         |                        |  |  |  |
|                     | MN15  | CCSD(T) | MN15<br>( $\Delta G$ ) |  |  |  |
| (1)                 | 0.00  | 0.00    | 0.00                   |  |  |  |
| TS <sub>14-1</sub>  | 0.29  | 0.64    | 0.23                   |  |  |  |
| (14)                | -0.69 | -0.43   | 0.13                   |  |  |  |
| TS <sub>14-15</sub> | 7.11  | 6.70    | 5.59                   |  |  |  |
| (15)                | -3.16 | -5.92   | -6.19                  |  |  |  |
| (16)                | 47.02 | 40.03   | 30.56                  |  |  |  |

**Table S2.** MN15 Cartesian coordinates (in Å) and equilibrium energies (E/a.u.) of the optimized geometries for all iron structures shown in Figure 2 for three different multiplicities.

| <b>S=1/2</b>         |           |           |           | <b>S=3/2</b>       |           |           |           | <b>S=5/2</b>       |           |           |           |
|----------------------|-----------|-----------|-----------|--------------------|-----------|-----------|-----------|--------------------|-----------|-----------|-----------|
| <b>Structure (1)</b> |           |           |           |                    |           |           |           |                    |           |           |           |
| E = -1604.49193963   |           |           |           | E = -1604.50817972 |           |           |           | E = -1604.51060978 |           |           |           |
| Fe                   | 0.187139  | 0.009471  | -0.090302 | Fe                 | 0.256890  | 0.037359  | -0.053652 | Fe                 | 0.205509  | -0.000705 | 0.001823  |
| O                    | -1.381401 | 0.708816  | -0.087077 | O                  | -1.311595 | 0.793963  | -0.171501 | O                  | -1.543774 | 0.002763  | -0.018966 |
| C                    | -2.724695 | 0.270842  | -0.154783 | C                  | -2.535863 | 0.106643  | -0.010200 | C                  | -2.952118 | 0.005556  | -0.035702 |
| H                    | -3.349327 | 1.139459  | -0.356585 | H                  | -3.268686 | 0.814082  | 0.377196  | H                  | -3.308543 | 0.195540  | -1.048355 |
| H                    | -3.031533 | -0.146795 | 0.807462  | H                  | -2.455577 | -0.726321 | 0.697769  | H                  | -3.326552 | 0.785097  | 0.628109  |
| H                    | -2.875637 | -0.460630 | -0.950182 | H                  | -2.902537 | -0.266588 | -0.968884 | H                  | -3.326005 | -0.961829 | 0.300262  |
| N                    | 0.855340  | 1.924176  | -0.297389 | N                  | 0.928437  | 1.914925  | -0.508139 | N                  | 0.376209  | 0.380499  | -2.105574 |
| H                    | 0.827988  | 2.217223  | -1.275462 | H                  | 1.468782  | 2.014424  | -1.368910 | H                  | 0.961069  | -0.269188 | -2.632063 |
| H                    | 1.770016  | 2.195458  | 0.062886  | H                  | 1.467447  | 2.386359  | 0.219795  | H                  | 0.720372  | 1.313256  | -2.337959 |
| H                    | 0.159441  | 2.505024  | 0.174446  | H                  | 0.063679  | 2.447858  | -0.631996 | H                  | -0.556469 | 0.318598  | -2.514799 |
| N                    | 1.914637  | -0.697653 | -1.014121 | N                  | 2.187648  | -0.677701 | -0.028648 | N                  | 2.439021  | -0.009592 | 0.041784  |
| H                    | 2.674770  | -0.017307 | -1.035039 | H                  | 2.808930  | -0.127542 | 0.567029  | H                  | 2.853081  | 0.862902  | -0.288982 |
| H                    | 1.739148  | -0.928191 | -1.995196 | H                  | 2.627064  | -0.665905 | -0.951699 | H                  | 2.855010  | -0.740419 | -0.536916 |
| H                    | 2.314397  | -1.542290 | -0.603429 | H                  | 2.265678  | -1.640323 | 0.302856  | H                  | 2.823811  | -0.153974 | 0.976407  |
| N                    | -0.614707 | -1.848359 | -0.120159 | N                  | -0.378268 | -1.558794 | -1.216270 | N                  | 0.277749  | -2.020889 | 0.726220  |
| H                    | -1.031610 | -2.052677 | -1.031485 | H                  | -0.893847 | -1.189567 | -2.018531 | H                  | -0.121486 | -2.651319 | 0.028748  |
| H                    | -1.386783 | -1.904283 | 0.546680  | H                  | -1.051227 | -2.136744 | -0.709158 | H                  | -0.336941 | -2.103000 | 1.537445  |
| H                    | 0.005540  | -2.631508 | 0.088260  | H                  | 0.320891  | -2.199502 | -1.592449 | H                  | 1.171235  | -2.427710 | 1.000592  |
| N                    | 0.930189  | -0.153951 | 1.841431  | N                  | -0.032275 | -0.421854 | 2.002970  | N                  | 0.278112  | 1.643864  | 1.380479  |
| H                    | 1.884226  | 0.178404  | 1.983330  | H                  | 0.775783  | -0.328946 | 2.619565  | H                  | 1.177735  | 2.046866  | 1.640154  |
| H                    | 0.895596  | -1.089100 | 2.247547  | H                  | -0.396670 | -1.360672 | 2.171738  | H                  | -0.179117 | 1.379542  | 2.254673  |
| H                    | 0.339316  | 0.425907  | 2.441607  | H                  | -0.739709 | 0.220467  | 2.364446  | H                  | -0.285172 | 2.411359  | 1.010863  |
| <b>Structure (2)</b> |           |           |           |                    |           |           |           |                    |           |           |           |
| E = -1644.9728937    |           |           |           | E = -1644.98856556 |           |           |           | E = -1644.98980371 |           |           |           |
| Fe                   | -0.304429 | -0.049525 | 0.007328  | Fe                 | 0.076470  | -0.275724 | 0.003428  | H                  | -2.065994 | 1.664019  | 0.025144  |
| H                    | 2.803886  | 2.771623  | 0.444624  | H                  | -3.448008 | 2.215291  | 0.234196  | Fe                 | -0.014839 | -0.366722 | 0.006330  |
| O                    | 0.854680  | -1.118293 | 0.709836  | O                  | 1.013075  | 0.967419  | 0.807877  | O                  | 1.507455  | 0.493814  | -0.004690 |
| C                    | 1.875854  | 2.288794  | 0.150115  | C                  | -2.803005 | 1.353823  | 0.083637  | C                  | -1.563534 | 2.634037  | -0.037479 |
| C                    | 1.979077  | -1.829985 | 0.237065  | C                  | 1.990981  | 1.789443  | 0.204837  | C                  | 2.732750  | 1.186448  | -0.013450 |
| H                    | 1.068334  | 2.718815  | 0.743281  | H                  | -3.253830 | 0.502388  | 0.593194  | H                  | -1.921654 | 3.163057  | -0.917216 |
| H                    | 1.981948  | 1.219208  | 0.351154  | H                  | -1.823495 | 1.593603  | 0.508017  | H                  | -0.479529 | 2.519551  | -0.098890 |
| H                    | 1.715645  | 2.482600  | -0.911001 | H                  | -2.741191 | 1.162134  | -0.988052 | H                  | -1.816203 | 3.217535  | 0.844133  |
| H                    | 2.677306  | -1.173881 | -0.289196 | H                  | 1.538989  | 2.639032  | -0.312279 | H                  | 2.818608  | 1.774041  | -0.927790 |
| H                    | 1.674992  | -2.653851 | -0.414650 | H                  | 2.625553  | 1.229844  | -0.491727 | H                  | 3.558058  | 0.475788  | 0.034084  |
| H                    | 2.489528  | -2.259434 | 1.097616  | H                  | 2.625334  | 2.183369  | 0.998027  | H                  | 2.785822  | 1.856002  | 0.845435  |
| N                    | -1.919191 | -1.307297 | -0.337851 | N                  | 1.786286  | -1.576332 | -0.240642 | N                  | -0.476489 | 0.307993  | 2.003395  |
| H                    | -2.823574 | -0.978977 | 0.000280  | H                  | 1.634718  | -2.578763 | -0.126425 | H                  | -1.440750 | 0.255535  | 2.329766  |
| H                    | -1.720533 | -2.170282 | 0.172469  | H                  | 2.469362  | -1.309588 | 0.470181  | H                  | -0.216675 | 1.294626  | 2.044112  |
| H                    | -2.063962 | -1.586212 | -1.308112 | H                  | 2.267894  | -1.477424 | -1.135064 | H                  | 0.093523  | -0.155120 | 2.712398  |
| N                    | -0.838352 | 0.364544  | 1.928397  | N                  | -0.623273 | -0.616339 | 1.887353  | N                  | -0.444741 | 0.169680  | -2.040696 |
| H                    | -1.812472 | 0.546091  | 2.168587  | H                  | -0.329338 | -1.492630 | 2.321061  | H                  | -1.045373 | -0.429448 | -2.605432 |
| H                    | -0.294387 | 1.149997  | 2.290400  | H                  | -1.635149 | -0.555290 | 2.006835  | H                  | 0.439554  | 0.251840  | -2.542907 |
| H                    | -0.536227 | -0.448056 | 2.469316  | H                  | -0.203507 | 0.142296  | 2.431072  | H                  | -0.863910 | 1.100918  | -2.068073 |
| N                    | 0.508826  | -0.286071 | -1.832471 | N                  | 0.034475  | 0.803798  | -1.735247 | N                  | 0.883160  | -2.310027 | 0.062357  |
| H                    | -0.047477 | 0.001066  | -2.638093 | H                  | -0.569603 | 0.474597  | -2.488445 | H                  | 1.577700  | -2.346384 | 0.809772  |
| H                    | 0.765480  | -1.262307 | -1.988494 | H                  | 0.968987  | 0.911718  | -2.133883 | H                  | 1.411254  | -2.473891 | -0.796243 |
| H                    | 1.384773  | 0.239755  | -1.886146 | H                  | -0.277074 | 1.750932  | -1.507152 | H                  | 0.282794  | -3.124274 | 0.187863  |
| N                    | -1.305479 | 1.647126  | -0.643309 | N                  | -1.263490 | -1.634582 | -0.761723 | N                  | -2.043739 | -1.305777 | 0.012430  |
| H                    | -0.631989 | 2.368414  | -0.912184 | H                  | -2.189775 | -1.209096 | -0.852911 | H                  | -2.192448 | -1.963232 | -0.753566 |
| H                    | -1.893900 | 2.080735  | 0.068266  | H                  | -1.396432 | -2.456344 | -0.171071 | H                  | -2.796380 | -0.620480 | -0.069920 |

|                      |           |           |           |                    |           |           |           |                    |           |           |           |
|----------------------|-----------|-----------|-----------|--------------------|-----------|-----------|-----------|--------------------|-----------|-----------|-----------|
| H                    | -1.909880 | 1.507741  | -1.453781 | H                  | -1.022113 | -1.992009 | -1.686758 | H                  | -2.244869 | -1.831816 | 0.863459  |
| <b>Structure (3)</b> |           |           |           |                    |           |           |           |                    |           |           |           |
| E = -1644.98516138   |           |           |           | E = -1644.99494275 |           |           |           | Not available      |           |           |           |
| Fe                   | -0.288961 | -0.018263 | -0.010380 | Fe                 | 0.346277  | -0.006405 | -0.035668 |                    |           |           |           |
| H                    | -0.271057 | 0.069589  | -2.554270 | H                  | 0.063642  | -0.062180 | -2.511594 |                    |           |           |           |
| O                    | 1.557436  | 0.423993  | -0.670059 | O                  | -1.800894 | -0.505625 | -0.491908 |                    |           |           |           |
| C                    | -0.850645 | -0.506456 | -1.830962 | C                  | 0.934836  | 0.200351  | -1.910198 |                    |           |           |           |
| C                    | 2.828878  | 0.012292  | -0.113428 | C                  | -2.985003 | 0.118716  | 0.049629  |                    |           |           |           |
| H                    | -1.906101 | -0.280082 | -1.976960 | H                  | 1.757736  | -0.483423 | -2.105407 |                    |           |           |           |
| H                    | 1.650862  | 0.605906  | -1.615580 | H                  | -2.047865 | -1.026617 | -1.267078 |                    |           |           |           |
| H                    | -0.688549 | -1.569210 | -2.009444 | H                  | 1.231733  | 1.227681  | -2.106203 |                    |           |           |           |
| H                    | 3.195049  | -0.878971 | -0.618647 | H                  | -3.404647 | 0.829304  | -0.659587 |                    |           |           |           |
| H                    | 2.664847  | -0.199094 | 0.939577  | H                  | -2.687810 | 0.642794  | 0.955650  |                    |           |           |           |
| H                    | 3.550240  | 0.818303  | -0.213531 | H                  | -3.728769 | -0.632589 | 0.302123  |                    |           |           |           |
| N                    | 0.266399  | 0.693520  | 1.970586  | N                  | -0.209892 | -0.285613 | 2.036845  |                    |           |           |           |
| H                    | -0.494403 | 1.147376  | 2.476497  | H                  | 0.482508  | -0.808654 | 2.572413  |                    |           |           |           |
| H                    | 0.997932  | 1.400632  | 1.893270  | H                  | -1.069502 | -0.833086 | 2.088938  |                    |           |           |           |
| H                    | 0.628953  | -0.006045 | 2.617509  | H                  | -0.386344 | 0.560299  | 2.577549  |                    |           |           |           |
| N                    | -0.850328 | 1.888859  | -0.498830 | N                  | 0.677519  | -2.050464 | -0.293708 |                    |           |           |           |
| H                    | -1.335611 | 2.408283  | 0.233233  | H                  | 1.653849  | -2.314592 | -0.159432 |                    |           |           |           |
| H                    | -1.457360 | 1.915988  | -1.318321 | H                  | 0.450120  | -2.347222 | -1.242941 |                    |           |           |           |
| H                    | -0.030603 | 2.449294  | -0.734153 | H                  | 0.130218  | -2.640946 | 0.332020  |                    |           |           |           |
| N                    | 0.333073  | -1.938327 | 0.355290  | N                  | -0.290900 | 1.979303  | -0.151938 |                    |           |           |           |
| H                    | -0.407692 | -2.635125 | 0.276994  | H                  | 0.480057  | 2.630571  | -0.300288 |                    |           |           |           |
| H                    | 0.782702  | -2.103860 | 1.255483  | H                  | -0.821818 | 2.339587  | 0.640177  |                    |           |           |           |
| H                    | 1.018758  | -2.198864 | -0.354873 | H                  | -0.891847 | 2.075594  | -0.971357 |                    |           |           |           |
| N                    | -2.184129 | -0.508665 | 0.593530  | N                  | 2.413070  | 0.532209  | 0.642867  |                    |           |           |           |
| H                    | -2.507061 | -1.334325 | 0.088365  | H                  | 2.948956  | 0.924255  | -0.131552 |                    |           |           |           |
| H                    | -2.875245 | 0.211324  | 0.381310  | H                  | 2.974962  | -0.244566 | 0.990770  |                    |           |           |           |
| H                    | -2.286651 | -0.720954 | 1.586191  | H                  | 2.441198  | 1.232891  | 1.383395  |                    |           |           |           |
| <b>Structure (4)</b> |           |           |           |                    |           |           |           |                    |           |           |           |
| Not available        |           |           |           | E = -1754.61423504 |           |           |           | E = -1754.60331735 |           |           |           |
|                      |           |           |           | Fe                 | 0.626208  | -0.038520 | -0.034402 | Fe                 | 0.427486  | -0.023442 | 0.034583  |
|                      |           |           |           | O                  | -1.641194 | 0.864168  | 0.385009  | O                  | -1.080996 | 0.679554  | 0.704064  |
|                      |           |           |           | O                  | -2.991784 | -0.727316 | -0.039002 | O                  | -2.927699 | -0.345525 | -0.042486 |
|                      |           |           |           | O                  | -2.757114 | 0.486491  | -0.096820 | O                  | -2.480903 | 0.772658  | 0.248001  |
|                      |           |           |           | C                  | -0.158428 | -0.704159 | -1.720663 | C                  | -0.452949 | 0.339378  | -1.911078 |
|                      |           |           |           | H                  | -0.768684 | 0.074838  | -2.173902 | H                  | -0.903894 | 1.313547  | -1.776923 |
|                      |           |           |           | H                  | -0.736661 | -1.613635 | -1.584624 | H                  | -1.153863 | -0.486296 | -1.955077 |
|                      |           |           |           | H                  | 0.716705  | -0.897167 | -2.344565 | H                  | 0.394031  | 0.287870  | -2.582361 |
|                      |           |           |           | N                  | 2.722347  | -0.673773 | -0.234749 | N                  | 2.125894  | -0.883204 | -1.020681 |
|                      |           |           |           | H                  | 2.794231  | -1.507825 | -0.819506 | H                  | 1.860759  | -1.536423 | -1.758757 |
|                      |           |           |           | H                  | 3.183326  | -0.918299 | 0.642096  | H                  | 2.726872  | -1.414981 | -0.389019 |
|                      |           |           |           | H                  | 3.333678  | 0.012550  | -0.678008 | H                  | 2.733299  | -0.195096 | -1.467080 |
|                      |           |           |           | N                  | 0.011797  | -1.787548 | 0.833934  | N                  | -0.358596 | -2.074420 | 0.111637  |
|                      |           |           |           | H                  | -1.009221 | -1.780244 | 0.895719  | H                  | -1.329924 | -1.969337 | 0.415028  |
|                      |           |           |           | H                  | 0.363594  | -1.966656 | 1.774540  | H                  | 0.085963  | -2.709268 | 0.775266  |
|                      |           |           |           | H                  | 0.246211  | -2.608527 | 0.274727  | H                  | -0.396873 | -2.585321 | -0.770695 |
|                      |           |           |           | N                  | 0.840923  | 1.751881  | -1.015152 | N                  | 1.327850  | 1.969839  | -0.204801 |
|                      |           |           |           | H                  | -0.049844 | 2.253283  | -1.023938 | H                  | 0.652819  | 2.615889  | 0.209354  |
|                      |           |           |           | H                  | 1.098228  | 1.630975  | -1.995693 | H                  | 1.465229  | 2.289534  | -1.163871 |
|                      |           |           |           | H                  | 1.524402  | 2.391557  | -0.608946 | H                  | 2.213403  | 2.136692  | 0.273422  |
| N                    | 0.799846  | 0.955477  | 1.871409  | N                  | 1.317390  | -0.112785 | 2.012767  |                    |           |           |           |
| H                    | 0.399832  | 1.894553  | 1.853992  | H                  | 0.890381  | 0.647683  | 2.546643  |                    |           |           |           |
| H                    | 1.759772  | 1.073186  | 2.196412  | H                  | 2.326469  | -0.009941 | 2.119416  |                    |           |           |           |
| H                    | 0.309917  | 0.478878  | 2.628539  | H                  | 1.067390  | -0.960822 | 2.522875  |                    |           |           |           |



| <b>Structure (5)</b> |           |           |           |                    |           |           |           |                    |           |           |           |
|----------------------|-----------|-----------|-----------|--------------------|-----------|-----------|-----------|--------------------|-----------|-----------|-----------|
| Not available        |           |           |           | E = -1754.62543825 |           |           |           | E = -1754.63711083 |           |           |           |
|                      |           |           |           | Fe                 | -0.532703 | -0.012004 | 0.045124  | Fe                 | -0.652174 | -0.002685 | -0.068923 |
|                      |           |           |           | O                  | 0.768243  | -0.068400 | 1.003766  | O                  | 0.282647  | -0.136174 | -1.360952 |
|                      |           |           |           | O                  | 3.905335  | 0.031201  | 0.458834  | O                  | 3.253461  | 0.041487  | 0.014233  |
|                      |           |           |           | O                  | 2.956746  | -0.008962 | -0.257738 | O                  | 4.394188  | -0.128026 | -0.298629 |
|                      |           |           |           | C                  | 0.243460  | -1.206197 | -1.363972 | C                  | 0.528734  | 1.532451  | 0.840212  |
|                      |           |           |           | H                  | 1.064156  | -1.733287 | -0.891211 | H                  | 1.197176  | 1.816982  | 0.038798  |
|                      |           |           |           | H                  | 0.585073  | -0.582798 | -2.184586 | H                  | 1.008460  | 1.025064  | 1.668150  |
|                      |           |           |           | H                  | -0.552704 | -1.878563 | -1.669394 | H                  | -0.204472 | 2.273483  | 1.133290  |
|                      |           |           |           | N                  | -2.215094 | 0.112755  | -1.226073 | N                  | -1.880922 | 0.117160  | 1.651644  |
|                      |           |           |           | H                  | -1.966861 | -0.023069 | -2.207420 | H                  | -1.424542 | 0.552216  | 2.454762  |
|                      |           |           |           | H                  | -2.695556 | 1.011871  | -1.176545 | H                  | -2.183781 | -0.804342 | 1.969666  |
|                      |           |           |           | H                  | -2.932359 | -0.587414 | -1.032203 | H                  | -2.743761 | 0.644001  | 1.511416  |
|                      |           |           |           | N                  | 0.241079  | 1.585442  | -0.896542 | N                  | 0.539230  | -1.370727 | 0.862471  |
|                      |           |           |           | H                  | 1.244149  | 1.411620  | -0.998710 | H                  | 1.511379  | -1.122490 | 0.654193  |
|                      |           |           |           | H                  | 0.161487  | 2.440049  | -0.344334 | H                  | 0.400886  | -2.292109 | 0.443372  |
|                      |           |           |           | H                  | -0.121673 | 1.788286  | -1.828075 | H                  | 0.458569  | -1.480814 | 1.873239  |
|                      |           |           |           | N                  | -1.192753 | -1.731818 | 0.893754  | N                  | -1.603630 | 1.563851  | -0.984759 |
|                      |           |           |           | H                  | -0.351877 | -2.271724 | 1.108529  | H                  | -0.891056 | 2.140973  | -1.435966 |
|                      |           |           |           | H                  | -1.780871 | -2.332945 | 0.316121  | H                  | -2.179962 | 2.186359  | -0.418358 |
|                      |           |           |           | H                  | -1.677870 | -1.602369 | 1.782222  | H                  | -2.189941 | 1.216904  | -1.746103 |
|                      |           |           |           | N                  | -1.691386 | 1.185472  | 1.426482  | N                  | -2.109595 | -1.485435 | -0.840685 |
|                      |           |           |           | H                  | -1.144462 | 1.274058  | 2.284635  | H                  | -1.817532 | -1.693454 | -1.796897 |
|                      |           |           |           | H                  | -2.594254 | 0.801101  | 1.704740  | H                  | -3.085841 | -1.194664 | -0.896852 |
|                      |           |           |           | H                  | -1.882365 | 2.140810  | 1.124591  | H                  | -2.129405 | -2.385250 | -0.359906 |
| <b>Structure (6)</b> |           |           |           |                    |           |           |           |                    |           |           |           |
| E = -1644.95395593   |           |           |           | E = -1644.97190833 |           |           |           | E = -1644.9717126  |           |           |           |
| Fe                   | 0.644597  | -0.109431 | 0.015708  | Fe                 | 0.702282  | 0.078165  | 0.000700  | H                  | 3.746398  | 1.723059  | 0.959757  |
| H                    | -3.692582 | -1.600816 | 1.014052  | H                  | -3.774602 | 1.729143  | -0.919571 | Fe                 | -0.696604 | 0.081588  | 0.001138  |
| O                    | -1.202922 | 0.593962  | -0.178779 | O                  | -1.337440 | -0.557549 | -0.000638 | O                  | 1.329983  | -0.600640 | -0.001705 |
| C                    | -3.774250 | -1.069030 | 0.079432  | C                  | -3.866999 | 1.185513  | 0.007003  | C                  | 3.835315  | 1.217665  | 0.011459  |
| C                    | -1.577761 | 1.980001  | -0.064316 | C                  | -1.806641 | -1.919908 | -0.005743 | C                  | 1.781057  | -1.968878 | -0.008621 |
| H                    | -3.718289 | -1.615653 | -0.848576 | H                  | -3.774884 | 1.712709  | 0.943046  | H                  | 3.739227  | 1.782450  | -0.901984 |
| H                    | -1.991981 | 0.017326  | -0.074420 | H                  | -2.107250 | 0.053597  | 0.002578  | H                  | 2.103757  | 0.003175  | 0.002380  |
| H                    | -4.243374 | -0.096814 | 0.079529  | H                  | -4.370945 | 0.231136  | -0.001667 | H                  | 4.341200  | 0.264714  | -0.021387 |
| H                    | -2.438489 | 2.181842  | -0.696794 | H                  | -2.403260 | -2.122627 | 0.881265  | H                  | 2.367382  | -2.174134 | -0.901849 |
| H                    | -0.736103 | 2.576871  | -0.409973 | H                  | -0.929646 | -2.565091 | -0.004687 | H                  | 0.895421  | -2.602014 | -0.005685 |
| H                    | -1.812262 | 2.234267  | 0.968044  | H                  | -2.397959 | -2.117876 | -0.897381 | H                  | 2.376837  | -2.179906 | 0.876936  |
| N                    | 0.858572  | 0.984217  | 1.806866  | N                  | 0.935781  | -0.939168 | -1.883957 | N                  | -0.947278 | -0.927983 | 1.888635  |
| H                    | 1.648020  | 0.752041  | 2.408215  | H                  | 1.456172  | -0.428740 | -2.597468 | H                  | -1.449136 | -0.402990 | 2.604868  |
| H                    | 0.026399  | 0.874609  | 2.386668  | H                  | 0.021088  | -1.134246 | -2.291277 | H                  | -0.035472 | -1.146871 | 2.290271  |
| H                    | 0.933912  | 1.987040  | 1.633011  | H                  | 1.402946  | -1.842450 | -1.803072 | H                  | -1.438874 | -1.818583 | 1.812007  |
| N                    | -0.207188 | -2.040182 | -0.069111 | N                  | -0.133563 | 2.074073  | -0.009675 | N                  | 0.189051  | 2.054783  | -0.020356 |
| H                    | 0.424960  | -2.833631 | 0.028813  | H                  | 0.533183  | 2.844726  | -0.018913 | H                  | -0.455970 | 2.843714  | -0.032565 |
| H                    | -0.691696 | -2.180220 | -0.956631 | H                  | -0.730368 | 2.233464  | 0.802687  | H                  | 0.797864  | 2.180459  | -0.829858 |
| H                    | -0.922002 | -2.167696 | 0.648611  | H                  | -0.738994 | 2.221253  | -0.817941 | H                  | 0.791992  | 2.201057  | 0.790109  |
| N                    | 1.114069  | 0.828840  | -1.825683 | N                  | 0.932456  | -0.938787 | 1.886127  | N                  | -0.956101 | -0.935330 | -1.880985 |
| H                    | 1.630213  | 1.703951  | -1.733589 | H                  | 1.406084  | -1.838971 | 1.808408  | H                  | -1.438440 | -1.830185 | -1.795506 |
| H                    | 0.251017  | 1.064271  | -2.315553 | H                  | 0.016661  | -1.139596 | 2.288141  | H                  | -0.046723 | -1.147555 | -2.291624 |
| H                    | 1.659005  | 0.265450  | -2.477803 | H                  | 1.445208  | -0.424562 | 2.602456  | H                  | -1.470608 | -0.418097 | -2.593857 |
| N                    | 2.516779  | -0.850274 | 0.179462  | N                  | 2.813538  | 0.765253  | 0.005328  | N                  | -2.790995 | 0.814955  | 0.009066  |
| H                    | 2.779350  | -1.463097 | -0.593188 | H                  | 3.043501  | 1.343828  | 0.813184  | H                  | -3.014873 | 1.390359  | -0.802756 |
| H                    | 2.658743  | -1.404291 | 1.024954  | H                  | 3.048378  | 1.338465  | -0.804950 | H                  | -3.005718 | 1.401503  | 0.815355  |
| H                    | 3.235452  | -0.125969 | 0.205022  | H                  | 3.499242  | 0.010720  | 0.009738  | H                  | -3.493389 | 0.075968  | 0.017892  |
| <b>Structure (7)</b> |           |           |           |                    |           |           |           |                    |           |           |           |

| E = -1720.18348454 |           |           |           | E = -1720.1917661  |           |           |           | E = -1720.19531651 |           |           |           |
|--------------------|-----------|-----------|-----------|--------------------|-----------|-----------|-----------|--------------------|-----------|-----------|-----------|
| H                  | 2.401633  | -0.660216 | -0.875539 | H                  | -2.580790 | -0.012103 | 0.925832  | H                  | -2.740225 | -0.551400 | -0.016257 |
| Fe                 | -0.393036 | -0.025458 | 0.012793  | Fe                 | 0.385910  | -0.116003 | -0.018179 | Fe                 | 0.342348  | 0.046172  | -0.001386 |
| O                  | 0.649546  | 1.149997  | -0.812289 | O                  | -0.414276 | 1.241298  | 0.778860  | O                  | -0.942257 | 1.241499  | -0.012557 |
| C                  | 2.429781  | -1.279442 | 0.015561  | C                  | -2.822529 | -0.702720 | 0.123678  | C                  | -2.445026 | -1.594169 | -0.000460 |
| C                  | 1.656679  | 1.917655  | -0.195809 | C                  | -1.070479 | 2.327690  | 0.164958  | C                  | -2.007713 | 2.158735  | -0.001448 |
| O                  | 1.176522  | -1.055778 | 0.719096  | O                  | -1.574746 | -1.016861 | -0.550969 | O                  | -0.990928 | -1.623247 | 0.008275  |
| H                  | 3.260819  | -0.972427 | 0.644210  | H                  | -3.514222 | -0.231366 | -0.569875 | H                  | -2.816746 | -2.099902 | -0.887320 |
| H                  | 2.523187  | -2.331391 | -0.243501 | H                  | -3.263628 | -1.610135 | 0.528678  | H                  | -2.827091 | -2.076002 | 0.895261  |
| H                  | 2.412579  | 2.162992  | -0.941711 | H                  | -1.631245 | 2.853655  | 0.937285  | H                  | -1.625189 | 3.179613  | 0.017173  |
| H                  | 2.147646  | 1.383231  | 0.624949  | H                  | -1.780935 | 1.996920  | -0.600255 | H                  | -2.628421 | 2.000461  | 0.881796  |
| H                  | 1.261354  | 2.864323  | 0.185574  | H                  | -0.367952 | 3.043086  | -0.272657 | H                  | -2.620427 | 2.030626  | -0.895009 |
| N                  | -1.634274 | -1.485842 | 0.840350  | N                  | 1.223235  | -1.856727 | -0.769034 | N                  | 1.913361  | -1.588635 | 0.017783  |
| H                  | -1.657061 | -1.514755 | 1.859727  | H                  | 1.144048  | -1.984982 | -1.777583 | H                  | 1.875209  | -2.207225 | -0.791908 |
| H                  | -1.321421 | -2.413054 | 0.550971  | H                  | 0.795755  | -2.682402 | -0.348700 | H                  | 1.866890  | -2.197943 | 0.834039  |
| H                  | -2.609882 | -1.423955 | 0.549716  | H                  | 2.219479  | -1.917736 | -0.557886 | H                  | 2.858118  | -1.205952 | 0.020490  |
| H                  | 1.203438  | -1.472480 | 1.589331  | H                  | -1.750815 | -1.677051 | -1.233564 | H                  | -0.696139 | -2.542516 | 0.018360  |
| N                  | -0.420983 | 1.088573  | 1.689997  | N                  | 0.395861  | 0.813441  | -1.838824 | N                  | 0.447287  | -0.060655 | -2.200612 |
| H                  | -0.424981 | 2.078343  | 1.438676  | H                  | 0.630524  | 1.801509  | -1.737508 | H                  | 0.207800  | 0.855650  | -2.578093 |
| H                  | 0.443327  | 0.951224  | 2.215244  | H                  | -0.554692 | 0.790658  | -2.211629 | H                  | -0.282463 | -0.692561 | -2.529146 |
| H                  | -1.189929 | 0.953629  | 2.346416  | H                  | 1.009506  | 0.438586  | -2.561470 | H                  | 1.306179  | -0.349884 | -2.665518 |
| N                  | -0.289229 | -1.072712 | -1.712269 | N                  | 0.240944  | -0.943494 | 1.854789  | N                  | 0.439878  | -0.028421 | 2.200233  |
| H                  | 0.126031  | -0.406506 | -2.367489 | H                  | 0.158952  | -0.133458 | 2.472362  | H                  | 0.188735  | 0.890197  | 2.564299  |
| H                  | -1.146310 | -1.429023 | -2.133555 | H                  | 0.967361  | -1.557029 | 2.221338  | H                  | 1.301658  | -0.300228 | 2.670330  |
| H                  | 0.352409  | -1.864339 | -1.661144 | H                  | -0.642486 | -1.449301 | 1.934772  | H                  | -0.282413 | -0.664455 | 2.537180  |
| N                  | -1.950007 | 0.978897  | -0.749439 | N                  | 2.439318  | 0.712627  | 0.467530  | N                  | 1.980434  | 1.525720  | -0.010903 |
| H                  | -1.504897 | 1.679087  | -1.347349 | H                  | 2.227464  | 1.596793  | 0.930863  | H                  | 1.540165  | 2.445518  | -0.028670 |
| H                  | -2.533866 | 1.485152  | -0.083748 | H                  | 3.073271  | 0.939537  | -0.297840 | H                  | 2.601189  | 1.495447  | -0.818695 |
| H                  | -2.590997 | 0.446624  | -1.336834 | H                  | 3.001455  | 0.184635  | 1.134310  | H                  | 2.587309  | 1.520596  | 0.807925  |
| Structure (8)      |           |           |           |                    |           |           |           |                    |           |           |           |
| E = -1720.15719017 |           |           |           | E = -1720.17601048 |           |           |           | E = -1720.17393956 |           |           |           |
| H                  | -1.150943 | 1.775318  | 0.405546  | H                  | -2.084777 | -0.834550 | 0.436372  | H                  | -2.193002 | -0.098668 | 0.481220  |
| Fe                 | 0.328474  | -0.381533 | -0.005868 | Fe                 | 0.391840  | 0.216121  | -0.006070 | Fe                 | 0.459820  | 0.107063  | -0.009053 |
| O                  | -0.190018 | 1.617532  | 0.407043  | O                  | -1.757306 | 0.029555  | 0.142635  | O                  | -1.614343 | 0.640701  | 0.235345  |
| C                  | -2.923634 | 0.510419  | -0.079563 | C                  | -0.752576 | -2.817072 | 0.041198  | C                  | -1.730877 | -2.387323 | 0.030578  |
| C                  | 0.524314  | 2.813756  | 0.041042  | C                  | -2.861994 | 0.936454  | -0.065865 | C                  | -2.401977 | 1.830862  | 0.012423  |
| O                  | -2.115827 | -0.497403 | 0.388745  | O                  | 0.275605  | -2.004512 | 0.467889  | O                  | -0.473101 | -2.028660 | 0.464461  |
| H                  | -2.796226 | 0.747933  | -1.122294 | H                  | -1.142983 | -2.578676 | -0.932399 | H                  | -2.000771 | -2.003780 | -0.937974 |
| H                  | -3.843539 | 0.714564  | 0.441373  | H                  | -0.861423 | -3.784498 | 0.498553  | H                  | -2.183336 | -3.268642 | 0.450256  |
| H                  | 0.012701  | 3.685603  | 0.438152  | H                  | -2.513016 | 1.735035  | -0.714437 | H                  | -1.719366 | 2.625456  | -0.272907 |
| H                  | 0.605816  | 2.902917  | -1.042800 | H                  | -3.200600 | 1.347776  | 0.882060  | H                  | -2.921590 | 2.113897  | 0.923958  |
| H                  | 1.514912  | 2.761591  | 0.483694  | H                  | -3.682054 | 0.420632  | -0.557724 | H                  | -3.118752 | 1.666715  | -0.788307 |
| N                  | 0.185831  | -2.459510 | -0.249658 | N                  | 2.601647  | 0.099236  | -0.170119 | N                  | 2.453428  | -0.851679 | -0.172725 |
| H                  | -0.795333 | -2.707944 | -0.380465 | H                  | 2.923125  | -0.851957 | -0.346879 | H                  | 2.366198  | -1.866670 | -0.212235 |
| H                  | 0.515994  | -3.024151 | 0.531640  | H                  | 3.094419  | 0.406870  | 0.667009  | H                  | 3.101666  | -0.659304 | 0.589874  |
| H                  | 0.671854  | -2.820029 | -1.070217 | H                  | 2.984705  | 0.661197  | -0.929425 | H                  | 2.950567  | -0.588133 | -1.022348 |
| H                  | -2.492013 | -0.867524 | 1.199278  | H                  | 0.749722  | -2.419661 | 1.201414  | H                  | -0.207136 | -2.588084 | 1.206772  |
| N                  | -0.167487 | -0.131323 | -1.962299 | N                  | 0.247147  | -0.388465 | -2.131534 | N                  | 0.036341  | -0.450569 | -2.112319 |
| H                  | -0.319797 | 0.852364  | -2.186404 | H                  | -0.734500 | -0.406450 | -2.405346 | H                  | -0.880652 | -0.130875 | -2.422311 |
| H                  | -1.035136 | -0.610178 | -2.206277 | H                  | 0.604662  | -1.328756 | -2.298475 | H                  | 0.036614  | -1.463097 | -2.232846 |
| H                  | 0.527002  | -0.462617 | -2.631588 | H                  | 0.714903  | 0.208239  | -2.812394 | H                  | 0.699409  | -0.089934 | -2.796720 |
| N                  | 0.705817  | -0.561617 | 1.979170  | N                  | 0.420006  | 0.558774  | 2.196013  | N                  | 0.723165  | 0.403490  | 2.164081  |
| H                  | 0.629660  | 0.365673  | 2.398765  | H                  | -0.422308 | 0.163592  | 2.612387  | H                  | -0.172258 | 0.736209  | 2.519958  |
| H                  | 1.634178  | -0.910121 | 2.216214  | H                  | 0.420202  | 1.542077  | 2.463063  | H                  | 1.409811  | 1.108254  | 2.429762  |
| H                  | 0.055802  | -1.152954 | 2.495875  | H                  | 1.201030  | 0.143472  | 2.701315  | H                  | 0.952797  | -0.419746 | 2.718552  |
| N                  | 2.433687  | 0.155735  | -0.409463 | N                  | 0.252650  | 2.396633  | -0.411038 | N                  | 1.060644  | 2.175139  | -0.511690 |
| H                  | 2.548155  | 0.831887  | -1.163629 | H                  | -0.453536 | 2.842023  | 0.174339  | H                  | 0.783161  | 2.863997  | 0.186189  |

|                       |           |           |           |                    |           |           |           |                    |           |           |           |
|-----------------------|-----------|-----------|-----------|--------------------|-----------|-----------|-----------|--------------------|-----------|-----------|-----------|
| H                     | 2.993757  | -0.651418 | -0.683215 | H                  | -0.009956 | 2.625948  | -1.368587 | H                  | 0.655541  | 2.498058  | -1.389730 |
| H                     | 2.920583  | 0.559871  | 0.389480  | H                  | 1.115426  | 2.908662  | -0.232477 | H                  | 2.067417  | 2.288492  | -0.623672 |
| <b>Structure (9)</b>  |           |           |           |                    |           |           |           |                    |           |           |           |
| E = -1720.18516172    |           |           |           | E = -1720.1913156  |           |           |           | E = -1720.19490029 |           |           |           |
| Fe                    | -0.335401 | -0.132997 | -0.024932 | Fe                 | 0.230650  | 0.251105  | -0.001516 | Fe                 | -0.152183 | 0.243162  | -0.008414 |
| C                     | 0.612042  | 2.533849  | 0.174316  | C                  | 1.252941  | -2.414515 | 0.186002  | C                  | -2.471714 | -1.907352 | 0.003456  |
| O                     | -0.362578 | 1.571096  | 0.502406  | O                  | 0.900355  | -1.186276 | 0.782277  | O                  | -1.446342 | -0.944704 | -0.024210 |
| H                     | 0.361284  | 3.061886  | -0.750970 | H                  | 2.123496  | -2.317847 | -0.471109 | H                  | -3.414811 | -1.459093 | -0.309490 |
| H                     | 1.616420  | 2.103889  | 0.060950  | H                  | 0.422431  | -2.858178 | -0.372738 | H                  | -2.586860 | -2.303046 | 1.013294  |
| H                     | 0.654076  | 3.276955  | 0.970130  | H                  | 1.522961  | -3.103639 | 0.985468  | H                  | -2.230392 | -2.728944 | -0.671867 |
| N                     | -0.379109 | -2.152465 | -0.524751 | N                  | -0.741102 | 1.946675  | -0.676956 | N                  | 1.601657  | 1.651801  | 0.137859  |
| H                     | 0.069253  | -2.403172 | -1.405674 | H                  | -1.217821 | 1.840025  | -1.572193 | H                  | 2.279450  | 1.326618  | 0.827204  |
| H                     | -1.313003 | -2.559549 | -0.567630 | H                  | -0.107170 | 2.738358  | -0.788291 | H                  | 1.328226  | 2.585860  | 0.441084  |
| H                     | 0.119766  | -2.678853 | 0.194377  | H                  | -1.457324 | 2.248604  | -0.015640 | H                  | 2.129380  | 1.786594  | -0.723679 |
| N                     | 0.385616  | 0.392420  | -1.847609 | N                  | 0.292737  | -0.578531 | -1.868475 | N                  | -0.224038 | 0.453717  | 2.190702  |
| H                     | 0.011476  | 1.313384  | -2.083119 | H                  | 1.137275  | -1.136130 | -2.000403 | H                  | -1.166418 | 0.221723  | 2.503008  |
| O                     | 0.169079  | -0.218113 | -2.635294 | H                  | 0.230796  | 0.054952  | -2.664878 | H                  | 0.015819  | 1.341960  | 2.627995  |
| H                     | 1.399483  | 0.508473  | -1.840616 | H                  | -0.489608 | -1.230727 | -1.945235 | H                  | 0.386415  | -0.244497 | 2.614507  |
| N                     | -1.026278 | -0.556368 | 1.843828  | N                  | 0.182514  | 0.924268  | 1.929818  | N                  | 0.186692  | 0.191732  | -2.186713 |
| H                     | -1.868254 | -1.120474 | 1.950415  | H                  | 0.392285  | 1.916050  | 2.146315  | H                  | 0.386373  | 1.055293  | -2.688739 |
| H                     | -1.224691 | 0.368529  | 2.231688  | H                  | 0.861330  | 0.349967  | 2.412043  | H                  | -0.648493 | -0.204618 | -2.617095 |
| H                     | -0.321491 | -0.984186 | 2.444998  | H                  | -0.723983 | 0.733580  | 2.349317  | H                  | 0.943003  | -0.454018 | -2.411920 |
| N                     | -2.252775 | 0.136838  | -0.618658 | N                  | 2.268942  | 1.182142  | -0.321836 | N                  | -1.472342 | 1.981241  | -0.287300 |
| H                     | -2.951792 | -0.488721 | -0.219893 | H                  | 2.474993  | 2.026862  | 0.210573  | H                  | -1.116034 | 2.760397  | -0.838840 |
| H                     | -2.420519 | 0.138105  | -1.624429 | H                  | 2.568900  | 1.385351  | -1.274642 | H                  | -1.808941 | 2.385499  | 0.586017  |
| H                     | -2.462895 | 1.079119  | -0.280772 | H                  | 2.914723  | 0.475568  | 0.032206  | H                  | -2.306134 | 1.645758  | -0.769628 |
| O                     | 1.498025  | -0.405079 | 0.725025  | O                  | -1.773080 | -0.645186 | 0.262498  | O                  | 1.330016  | -1.288138 | 0.182808  |
| C                     | 2.717655  | -0.795537 | 0.052581  | C                  | -3.166239 | -0.413876 | -0.049145 | C                  | 2.763201  | -1.384718 | 0.018997  |
| H                     | 1.687959  | 0.268243  | 1.395533  | H                  | -1.680430 | -1.441232 | 0.804457  | H                  | 0.945210  | -2.158485 | 0.349250  |
| H                     | 2.452978  | -1.540040 | -0.693698 | H                  | -3.213335 | 0.430122  | -0.731952 | H                  | 3.073407  | -0.608654 | -0.676600 |
| H                     | 3.401502  | -1.235287 | 0.772885  | H                  | -3.723656 | -0.182043 | 0.854781  | H                  | 3.024393  | -2.352967 | -0.397843 |
| H                     | 3.185857  | 0.066754  | -0.421156 | H                  | -3.592808 | -1.286854 | -0.535851 | H                  | 3.261059  | -1.251888 | 0.976768  |
| <b>Structure (10)</b> |           |           |           |                    |           |           |           |                    |           |           |           |
| E = -1720.16673164    |           |           |           | E = -1720.18333709 |           |           |           | Not available      |           |           |           |
| Fe                    | -0.601546 | -0.201605 | -0.005910 | Fe                 | -0.561325 | -0.192697 | -0.027149 |                    |           |           |           |
| H                     | 4.494799  | 1.599656  | -0.285000 | H                  | 4.591072  | 1.470024  | -0.436500 |                    |           |           |           |
| O                     | -1.328681 | 1.280373  | -0.501845 | O                  | -1.590486 | 1.046751  | -0.712904 |                    |           |           |           |
| C                     | 3.919530  | 1.062410  | 0.464994  | C                  | 4.019641  | 0.939739  | 0.321394  |                    |           |           |           |
| C                     | -2.310223 | 2.167241  | -0.006596 | C                  | -2.801644 | 1.474876  | -0.128588 |                    |           |           |           |
| O                     | 3.283368  | -0.093907 | -0.118193 | O                  | 3.284504  | -0.151827 | -0.270200 |                    |           |           |           |
| H                     | 3.132299  | 1.710168  | 0.840363  | H                  | 3.294497  | 1.620341  | 0.758756  |                    |           |           |           |
| H                     | 4.566209  | 0.768439  | 1.288229  | H                  | 4.685539  | 0.575326  | 1.099956  |                    |           |           |           |
| H                     | -2.134246 | 2.429071  | 1.038525  | H                  | -2.636952 | 2.327113  | 0.534998  |                    |           |           |           |
| H                     | -3.307071 | 1.733193  | -0.121152 | H                  | -3.301818 | 0.675933  | 0.431897  |                    |           |           |           |
| H                     | -2.273625 | 3.078063  | -0.601729 | H                  | -3.468681 | 1.798736  | -0.927095 |                    |           |           |           |
| N                     | -1.600342 | -1.765701 | -0.944272 | N                  | -2.073340 | -1.681871 | -0.245155 |                    |           |           |           |
| H                     | -2.258818 | -2.282261 | -0.361791 | H                  | -2.628009 | -1.837651 | 0.597137  |                    |           |           |           |
| H                     | -1.014610 | -2.467043 | -1.396995 | H                  | -1.771333 | -2.608570 | -0.546286 |                    |           |           |           |
| H                     | -2.159475 | -1.341924 | -1.687650 | H                  | -2.727519 | -1.349918 | -0.955586 |                    |           |           |           |
| N                     | 0.682336  | 0.051788  | -1.547465 | N                  | 0.634676  | 0.223108  | -1.599538 |                    |           |           |           |
| H                     | 0.674372  | -0.651397 | -2.284799 | H                  | 0.518448  | -0.424836 | -2.379518 |                    |           |           |           |
| H                     | 1.659087  | 0.139816  | -1.231045 | H                  | 1.638615  | 0.251433  | -1.372161 |                    |           |           |           |
| H                     | 0.409594  | 0.935705  | -1.979189 | H                  | 0.330239  | 1.136999  | -1.939805 |                    |           |           |           |
| N                     | -1.764927 | -0.254316 | 1.652535  | N                  | -0.778259 | 0.611175  | 1.876513  |                    |           |           |           |
| H                     | -1.818534 | -1.147956 | 2.141860  | H                  | -0.103924 | 0.342714  | 2.592606  |                    |           |           |           |
| H                     | -2.723043 | 0.011520  | 1.419315  | H                  | -1.702431 | 0.407810  | 2.260510  |                    |           |           |           |
| H                     | -1.454524 | 0.432624  | 2.342971  | H                  | -0.736196 | 1.629337  | 1.801624  |                    |           |           |           |

|                                     |           |           |           |                    |           |           |           |               |  |
|-------------------------------------|-----------|-----------|-----------|--------------------|-----------|-----------|-----------|---------------|--|
| N                                   | 0.847154  | -1.350352 | 0.911086  | N                  | 0.848120  | -1.522345 | 0.609145  |               |  |
| H                                   | 0.799210  | -1.381612 | 1.929392  | H                  | 0.735064  | -1.889021 | 1.553440  |               |  |
| H                                   | 1.780635  | -0.967713 | 0.676403  | H                  | 1.784945  | -1.086081 | 0.544585  |               |  |
| H                                   | 0.856411  | -2.324749 | 0.610073  | H                  | 0.896798  | -2.339302 | -0.000956 |               |  |
| H                                   | 3.968630  | -0.671438 | -0.477388 | H                  | 3.917589  | -0.747814 | -0.690476 |               |  |
| <b>Structure (11)</b>               |           |           |           |                    |           |           |           |               |  |
| E = -1720.17593467                  |           |           |           | E = -1720.18452233 |           |           |           | Not available |  |
| Fe                                  | -0.049230 | 0.193890  | 0.040736  | Fe                 | -0.109157 | 0.224825  | 0.028585  |               |  |
| H                                   | -0.777006 | -2.239063 | 0.082508  | H                  | -0.634260 | -2.136680 | 0.170566  |               |  |
| O                                   | 1.425298  | -1.055313 | -0.524174 | O                  | 1.665412  | -1.083577 | -0.416372 |               |  |
| C                                   | -1.234692 | -1.328939 | 0.481994  | C                  | -1.302657 | -1.380364 | 0.587445  |               |  |
| C                                   | 2.816728  | -1.034364 | -0.127928 | C                  | 3.028351  | -0.852580 | -0.002016 |               |  |
| O                                   | -2.504323 | -1.099457 | -0.074402 | O                  | -2.498349 | -1.326308 | -0.063855 |               |  |
| H                                   | 1.182015  | -1.938083 | -0.834476 | H                  | 1.597180  | -1.970132 | -0.794302 |               |  |
| H                                   | -1.287488 | -1.399349 | 1.572264  | H                  | -1.372323 | -1.421370 | 1.671557  |               |  |
| H                                   | 2.995088  | -1.744322 | 0.677011  | H                  | 3.325148  | -1.567965 | 0.762160  |               |  |
| H                                   | 3.037962  | -0.026349 | 0.211329  | H                  | 3.071571  | 0.153617  | 0.408743  |               |  |
| H                                   | 3.444647  | -1.276135 | -0.980917 | H                  | 3.702705  | -0.921907 | -0.852000 |               |  |
| N                                   | 1.221074  | 1.851093  | -0.566372 | N                  | 1.151007  | 1.888933  | -0.681045 |               |  |
| H                                   | 1.880881  | 2.204620  | 0.125440  | H                  | 1.671559  | 2.409129  | 0.023849  |               |  |
| H                                   | 0.705575  | 2.672343  | -0.881136 | H                  | 0.644860  | 2.592763  | -1.216817 |               |  |
| H                                   | 1.790292  | 1.566062  | -1.364099 | H                  | 1.851406  | 1.512130  | -1.319790 |               |  |
| N                                   | -0.816637 | 0.089102  | -1.832751 | N                  | -0.731107 | -0.193261 | -1.992747 |               |  |
| H                                   | -0.959048 | 0.979042  | -2.308628 | H                  | -1.006898 | 0.641580  | -2.508181 |               |  |
| H                                   | -1.733103 | -0.364000 | -1.751360 | H                  | -1.543632 | -0.811614 | -2.001919 |               |  |
| H                                   | -0.255959 | -0.478110 | -2.468067 | H                  | -0.012225 | -0.637551 | -2.562622 |               |  |
| N                                   | 0.703473  | 0.177625  | 1.945840  | N                  | 0.676974  | 0.241712  | 2.033420  |               |  |
| H                                   | -0.025128 | 0.238627  | 2.657609  | H                  | -0.024129 | 0.355890  | 2.764688  |               |  |
| H                                   | 1.368017  | 0.919176  | 2.165331  | H                  | 1.381476  | 0.955137  | 2.216060  |               |  |
| H                                   | 1.184504  | -0.703161 | 2.131385  | H                  | 1.127764  | -0.654287 | 2.219367  |               |  |
| N                                   | -1.580570 | 1.431156  | 0.537891  | N                  | -1.806069 | 1.553377  | 0.438992  |               |  |
| H                                   | -1.576953 | 1.799268  | 1.488316  | H                  | -2.202715 | 1.444317  | 1.371660  |               |  |
| H                                   | -2.439345 | 0.881017  | 0.429031  | H                  | -2.555734 | 1.300838  | -0.204730 |               |  |
| H                                   | -1.670375 | 2.246070  | -0.067553 | H                  | -1.646302 | 2.553381  | 0.325342  |               |  |
| H                                   | -3.136000 | -1.803637 | 0.128821  | H                  | -3.263668 | -1.401320 | 0.522062  |               |  |
| <b>Structure (TS<sub>2-3</sub>)</b> |           |           |           |                    |           |           |           |               |  |
| E = -1644.9366386                   |           |           |           | E = -1644.92962817 |           |           |           | Not available |  |
| Fe                                  | -0.261947 | 0.016502  | 0.009623  | Fe                 | -0.245457 | 0.047123  | -0.005910 |               |  |
| H                                   | 0.742891  | -2.653519 | 0.896809  | H                  | 0.357387  | -0.292710 | 2.922689  |               |  |
| O                                   | 1.418032  | -0.427596 | -0.661084 | O                  | 1.274208  | -0.938572 | 0.368638  |               |  |
| C                                   | -0.110320 | -1.966227 | 0.791677  | C                  | -0.288373 | 0.120330  | 2.132469  |               |  |
| C                                   | 2.678401  | 0.035383  | -0.193272 | C                  | 2.606087  | -0.587116 | 0.000476  |               |  |
| H                                   | -0.888538 | -2.532324 | 0.289928  | H                  | -1.260283 | -0.344387 | 2.273521  |               |  |
| H                                   | 0.816740  | -1.339412 | 0.061423  | H                  | 0.681278  | -0.441107 | 1.433231  |               |  |
| H                                   | -0.405024 | -1.735367 | 1.812877  | H                  | -0.330859 | 1.193726  | 2.296358  |               |  |
| H                                   | 2.907015  | -0.350424 | 0.802994  | H                  | 3.003198  | 0.195247  | 0.647799  |               |  |
| H                                   | 2.716374  | 1.128410  | -0.181956 | H                  | 2.653478  | -0.264089 | -1.042183 |               |  |
| H                                   | 3.441903  | -0.324288 | -0.879582 | H                  | 3.218857  | -1.478541 | 0.120710  |               |  |
| N                                   | -0.260082 | 1.913322  | -0.825415 | N                  | -0.047834 | -0.160724 | -2.074390 |               |  |
| H                                   | -0.079361 | 2.688250  | -0.187334 | H                  | -0.912395 | -0.295151 | -2.598621 |               |  |
| H                                   | -1.092748 | 2.181152  | -1.350515 | H                  | 0.521762  | -0.993454 | -2.236232 |               |  |
| H                                   | 0.511693  | 1.915987  | -1.496394 | H                  | 0.440017  | 0.610309  | -2.530627 |               |  |
| N                                   | -0.932082 | -0.765081 | -1.742286 | N                  | -1.366679 | -1.935099 | -0.027035 |               |  |
| H                                   | -1.468228 | -0.153683 | -2.357863 | H                  | -1.880835 | -2.228007 | -0.857196 |               |  |
| H                                   | -1.478517 | -1.620252 | -1.641487 | H                  | -2.004761 | -2.088756 | 0.753492  |               |  |
| H                                   | -0.083669 | -1.026147 | -2.251386 | H                  | -0.619589 | -2.620113 | 0.096652  |               |  |
| N                                   | 0.515529  | 0.779911  | 1.733252  | N                  | 0.886486  | 2.028902  | -0.121893 |               |  |

|                                     |           |           |           |                    |           |           |           |                    |           |           |           |
|-------------------------------------|-----------|-----------|-----------|--------------------|-----------|-----------|-----------|--------------------|-----------|-----------|-----------|
| H                                   | -0.133721 | 1.306002  | 2.319136  | H                  | 0.376590  | 2.841805  | -0.467545 |                    |           |           |           |
| H                                   | 1.294053  | 1.409506  | 1.533232  | H                  | 1.723323  | 1.964703  | -0.702010 |                    |           |           |           |
| H                                   | 0.906801  | 0.051185  | 2.332088  | H                  | 1.229268  | 2.298920  | 0.800772  |                    |           |           |           |
| N                                   | -2.179484 | 0.207785  | 0.715225  | N                  | -2.018528 | 1.092113  | -0.095443 |                    |           |           |           |
| H                                   | -2.279974 | -0.224179 | 1.635551  | H                  | -2.068350 | 1.804614  | 0.634415  |                    |           |           |           |
| H                                   | -2.867242 | -0.263403 | 0.127177  | H                  | -2.814574 | 0.474806  | 0.069880  |                    |           |           |           |
| H                                   | -2.509726 | 1.167731  | 0.817923  | H                  | -2.205683 | 1.569922  | -0.976903 |                    |           |           |           |
| <b>Structure (TS<sub>4-5</sub>)</b> |           |           |           |                    |           |           |           |                    |           |           |           |
| Not available                       |           |           |           | E = -1754.61069361 |           |           |           | E = -1754.60312771 |           |           |           |
|                                     |           |           |           | Fe                 | 0.415929  | 0.015152  | -0.029756 | Fe                 | 0.425983  | 0.012473  | -0.021445 |
|                                     |           |           |           | O                  | -0.987964 | 0.172822  | 0.970451  | O                  | -1.041677 | -0.505989 | -0.833028 |
|                                     |           |           |           | O                  | -2.979430 | -0.419204 | -0.069475 | O                  | -2.980677 | 0.299357  | 0.135652  |
|                                     |           |           |           | O                  | -2.440875 | 0.536878  | 0.430690  | O                  | -2.562977 | -0.683186 | -0.429095 |
|                                     |           |           |           | C                  | -0.444308 | 0.932076  | -1.576493 | C                  | -0.437463 | -0.745857 | 1.791824  |
|                                     |           |           |           | H                  | -0.901536 | 1.835299  | -1.185689 | H                  | -0.964814 | -1.629413 | 1.458467  |
|                                     |           |           |           | H                  | -1.187955 | 0.269133  | -2.007330 | H                  | -1.074266 | 0.085709  | 2.072296  |
|                                     |           |           |           | H                  | 0.359981  | 1.152771  | -2.274605 | H                  | 0.415488  | -0.918180 | 2.434794  |
|                                     |           |           |           | N                  | 2.189495  | -0.247208 | -1.084682 | N                  | 2.050513  | 0.677033  | 1.248451  |
|                                     |           |           |           | H                  | 2.047744  | -0.665398 | -2.005516 | H                  | 1.729394  | 1.187105  | 2.072313  |
|                                     |           |           |           | H                  | 2.845185  | -0.855341 | -0.592521 | H                  | 2.682383  | 1.311409  | 0.758092  |
|                                     |           |           |           | H                  | 2.691149  | 0.624305  | -1.261436 | H                  | 2.635937  | -0.080533 | 1.601943  |
|                                     |           |           |           | N                  | -0.222301 | -1.748777 | -0.755140 | N                  | -0.364949 | 2.083536  | 0.166632  |
|                                     |           |           |           | H                  | -1.184866 | -1.872797 | -0.430599 | H                  | -0.953643 | 2.227253  | -0.655397 |
|                                     |           |           |           | H                  | 0.303633  | -2.556873 | -0.421175 | H                  | 0.272374  | 2.878435  | 0.212771  |
|                                     |           |           |           | H                  | -0.253559 | -1.812342 | -1.773432 | H                  | -1.000058 | 2.188267  | 0.958929  |
|                                     |           |           |           | N                  | 1.048974  | 1.834102  | 0.558729  | N                  | 1.352794  | -1.980496 | -0.201900 |
|                                     |           |           |           | H                  | 0.310147  | 2.199888  | 1.163532  | H                  | 0.723160  | -2.502516 | -0.814347 |
|                                     |           |           |           | H                  | 1.168369  | 2.511443  | -0.195996 | H                  | 1.409457  | -2.522167 | 0.660597  |
|                                     |           |           |           | H                  | 1.908684  | 1.842889  | 1.108298  | H                  | 2.278158  | -2.036605 | -0.626698 |
|                                     |           |           |           | N                  | 1.356093  | -0.936613 | 1.736666  | N                  | 1.439076  | 0.537035  | -1.871856 |
|                                     |           |           |           | H                  | 0.649325  | -0.836979 | 2.467957  | H                  | 0.954888  | 0.025855  | -2.612986 |
|                                     |           |           |           | H                  | 2.206774  | -0.520200 | 2.114767  | H                  | 2.429212  | 0.313064  | -1.968034 |
|                                     |           |           |           | H                  | 1.548951  | -1.936716 | 1.684019  | H                  | 1.352159  | 1.521956  | -2.123636 |
| <b>Structure (TS<sub>5-1</sub>)</b> |           |           |           |                    |           |           |           |                    |           |           |           |
| E = -1604.39077871                  |           |           |           | E = -1604.39635073 |           |           |           | E = -1604.37202456 |           |           |           |
| H                                   | 1.315402  | 2.201251  | 0.563395  | H                  | -0.623507 | -2.590717 | 0.071386  | H                  | 2.712841  | -0.777306 | 0.301088  |
| H                                   | 1.549837  | 1.867238  | -1.023840 | H                  | 0.688295  | -2.344402 | -0.875364 | H                  | 2.526348  | 0.377569  | -0.836275 |
| N                                   | 0.860096  | 1.831432  | -0.271435 | N                  | 0.246478  | -2.060591 | 0.001035  | N                  | 2.205073  | 0.081593  | 0.086548  |
| H                                   | 0.142638  | 2.505349  | -0.543911 | H                  | 0.845234  | -2.398333 | 0.755556  | H                  | 2.556611  | 0.778719  | 0.743959  |
| O                                   | -0.821895 | 0.349042  | -1.445868 | O                  | 0.744087  | 0.059885  | -1.492811 | O                  | 0.000149  | 0.533146  | -1.575144 |
| H                                   | 1.917472  | -1.817807 | -0.012955 | H                  | -2.879821 | 0.188218  | -0.281898 | H                  | 0.808400  | -2.134027 | -1.440857 |
| H                                   | 2.620948  | -0.351931 | -0.145242 | H                  | -2.287810 | -0.917728 | -1.317294 | H                  | -0.808748 | -2.134000 | -1.440824 |
| N                                   | 1.812880  | -0.898907 | -0.444801 | N                  | -2.077226 | -0.022609 | -0.874140 | N                  | -0.000160 | -2.019053 | -0.827659 |
| Fe                                  | 0.001549  | -0.004800 | -0.172181 | Fe                 | -0.025727 | -0.005869 | -0.076004 | Fe                 | -0.000035 | -0.053526 | -0.063514 |
| H                                   | -2.588339 | 0.908683  | -0.215995 | H                  | 2.698732  | -0.789657 | -0.229397 | H                  | 0.922362  | 2.671029  | -0.485768 |
| C                                   | -1.814092 | 0.838288  | 0.535329  | C                  | 2.311802  | 0.104142  | 0.234792  | C                  | 0.000464  | 2.429497  | 0.019792  |
| H                                   | -2.039149 | 0.124937  | 1.320589  | H                  | 2.622200  | 1.033975  | -0.215735 | H                  | -0.921072 | 2.671392  | -0.486253 |
| H                                   | 1.932240  | -1.044323 | -1.450246 | H                  | -2.104806 | 0.647842  | -1.643918 | H                  | -0.000163 | -2.808484 | -0.181779 |
| H                                   | 0.124522  | 0.717969  | 2.380101  | H                  | -1.315737 | 0.726270  | 2.152727  | H                  | -0.000704 | 0.255906  | 2.627504  |
| N                                   | 0.466876  | -0.112078 | 1.893410  | N                  | -0.778672 | -0.100026 | 1.887360  | N                  | -0.000274 | -0.555075 | 2.005845  |
| H                                   | 0.012454  | -0.893245 | 2.368579  | H                  | -1.414896 | -0.885724 | 2.028187  | H                  | -0.814266 | -1.104763 | 2.283029  |
| H                                   | -1.485543 | 1.806568  | 0.894523  | H                  | 2.172007  | 0.091245  | 1.309078  | H                  | 0.000170  | 2.348268  | 1.101569  |
| H                                   | -1.908970 | -1.716093 | -0.143688 | H                  | 0.517420  | 2.424741  | -0.738978 | H                  | -2.526176 | 0.378288  | -0.836587 |
| N                                   | -0.893838 | -1.826102 | -0.155067 | N                  | 0.070890  | 2.060617  | 0.104599  | N                  | -2.205076 | 0.082264  | 0.086281  |
| H                                   | -0.690872 | -2.294768 | -1.039895 | H                  | -0.847271 | 2.504519  | 0.158151  | H                  | -2.713108 | -0.776482 | 0.300810  |
| H                                   | 1.455076  | -0.185890 | 2.137853  | H                  | -0.061343 | -0.198342 | 2.607469  | H                  | 0.813965  | -1.104206 | 2.283401  |
| H                                   | -0.660363 | -2.485621 | 0.587665  | H                  | 0.606404  | 2.415038  | 0.897901  | H                  | -2.556483 | 0.779518  | 0.743625  |

| Structure (TS <sub>2-6</sub> ) |           |           |           |                    |           |           |           |                    |           |           |           |
|--------------------------------|-----------|-----------|-----------|--------------------|-----------|-----------|-----------|--------------------|-----------|-----------|-----------|
| E = -1644.92833637             |           |           |           | E = -1644.94746904 |           |           |           | E = -1644.94420408 |           |           |           |
| Fe                             | 0.573802  | 0.040141  | -0.023510 | Fe                 | 0.676480  | 0.049332  | -0.001253 | H                  | 2.825525  | 2.100557  | 0.703940  |
| H                              | -2.500826 | 2.116619  | -0.127389 | H                  | -3.355123 | 2.063560  | -0.227561 | Fe                 | -0.637815 | 0.038809  | 0.015677  |
| O                              | -1.201999 | -0.602429 | 0.441854  | O                  | -1.359753 | -0.305551 | 0.020403  | O                  | 1.360048  | -0.486570 | -0.142085 |
| C                              | -2.995013 | 1.178591  | 0.107357  | C                  | -3.541010 | 1.014141  | -0.020973 | C                  | 3.185606  | 1.282122  | 0.088911  |
| C                              | -1.823534 | -1.725936 | -0.179882 | C                  | -1.910039 | -1.621051 | 0.025671  | C                  | 2.148218  | -1.662422 | 0.012162  |
| H                              | -3.537404 | 1.181331  | 1.047177  | H                  | -3.937117 | 0.820512  | 0.970083  | H                  | 3.437885  | 1.558651  | -0.929587 |
| H                              | -2.059490 | 0.337654  | 0.333382  | H                  | -2.406933 | 0.479284  | -0.006096 | H                  | 2.215954  | 0.484886  | -0.029849 |
| H                              | -3.549651 | 0.745953  | -0.719632 | H                  | -4.063896 | 0.496088  | -0.817918 | H                  | 3.942826  | 0.674976  | 0.574678  |
| H                              | -2.844124 | -1.829288 | 0.181721  | H                  | -2.595463 | -1.755164 | 0.861482  | H                  | 2.961169  | -1.677224 | -0.711135 |
| H                              | -1.269599 | -2.615469 | 0.124097  | H                  | -1.079987 | -2.324036 | 0.145180  | H                  | 1.492302  | -2.514513 | -0.182694 |
| H                              | -1.816063 | -1.648145 | -1.268080 | H                  | -2.423571 | -1.839502 | -0.910034 | H                  | 2.544397  | -1.749042 | 1.023316  |
| N                              | -0.033987 | 0.474197  | -1.987693 | N                  | 0.773442  | -1.050943 | -1.841062 | N                  | -0.555567 | -0.360904 | 2.138949  |
| H                              | 0.412214  | 1.276623  | -2.431306 | H                  | 1.406461  | -0.672094 | -2.545528 | H                  | -0.916412 | 0.382602  | 2.736787  |
| H                              | -1.037322 | 0.657249  | -2.026903 | H                  | -0.148256 | -1.079320 | -2.277611 | H                  | 0.414282  | -0.500901 | 2.421194  |
| H                              | 0.126036  | -0.307879 | -2.624101 | H                  | 1.054139  | -2.024154 | -1.718353 | H                  | -1.052500 | -1.204887 | 2.424627  |
| N                              | 0.294837  | 1.464942  | 1.522689  | N                  | 0.098979  | 2.124437  | -0.056388 | N                  | -0.116212 | 1.933887  | -0.851544 |
| H                              | 1.109237  | 1.679686  | 2.096895  | H                  | 0.837753  | 2.825898  | -0.053201 | H                  | -0.842709 | 2.393816  | -1.399387 |
| H                              | -0.416360 | 1.113297  | 2.164496  | H                  | -0.504100 | 2.346130  | 0.735942  | H                  | 0.684667  | 1.828682  | -1.475184 |
| H                              | -0.049296 | 2.367696  | 1.195258  | H                  | -0.465733 | 2.314487  | -0.884415 | H                  | 0.170032  | 2.617250  | -0.150113 |
| N                              | 1.325896  | -1.805194 | 0.674638  | N                  | 0.797725  | -0.905573 | 1.915750  | N                  | -1.006923 | -1.452782 | -1.510704 |
| H                              | 1.247608  | -2.554585 | -0.013538 | H                  | 1.130909  | -1.869045 | 1.876080  | H                  | -1.184453 | -2.378759 | -1.121001 |
| H                              | 0.786369  | -2.116817 | 1.482885  | H                  | -0.129720 | -0.946310 | 2.338956  | H                  | -0.183834 | -1.556329 | -2.104272 |
| H                              | 2.301015  | -1.812513 | 0.971208  | H                  | 1.396894  | -0.439166 | 2.597007  | H                  | -1.787412 | -1.270626 | -2.140895 |
| N                              | 2.447739  | 0.712584  | -0.411696 | N                  | 2.840342  | 0.495616  | -0.035170 | N                  | -2.808259 | 0.488321  | 0.196474  |
| H                              | 3.070266  | 0.655310  | 0.394753  | H                  | 3.140180  | 1.065552  | 0.755888  | H                  | -3.233434 | 0.748335  | -0.693453 |
| H                              | 2.475233  | 1.691330  | -0.699677 | H                  | 3.123439  | 1.022851  | -0.861256 | H                  | -3.015742 | 1.263781  | 0.825414  |
| H                              | 2.919195  | 0.196079  | -1.155254 | H                  | 3.442533  | -0.327086 | -0.019361 | H                  | -3.363969 | -0.295588 | 0.538017  |
| Structure (TS <sub>7-8</sub> ) |           |           |           |                    |           |           |           |                    |           |           |           |
| E = -1720.12863356             |           |           |           | E = -1720.14297835 |           |           |           | E = -1720.14080223 |           |           |           |
| H                              | 2.112097  | 0.220193  | -0.297222 | H                  | -2.134545 | -0.441672 | 0.209358  | H                  | -2.069576 | -0.351013 | 0.286948  |
| Fe                             | -0.513497 | -0.095678 | 0.001594  | Fe                 | 0.495962  | 0.046216  | -0.008869 | Fe                 | 0.497168  | 0.023667  | -0.000024 |
| O                              | 1.077959  | 1.015469  | -0.453689 | O                  | -1.439765 | 0.682320  | 0.239537  | O                  | -1.379214 | 0.708790  | 0.470886  |
| C                              | 2.564132  | -0.925987 | -0.050569 | C                  | -2.083808 | -1.687255 | 0.122340  | C                  | -2.141518 | -1.590639 | -0.027094 |
| C                              | 1.403558  | 2.318457  | 0.004259  | C                  | -2.240040 | 1.806710  | -0.085580 | C                  | -2.166755 | 1.826285  | 0.082355  |
| O                              | 1.418487  | -1.693880 | -0.192456 | O                  | -0.730187 | -1.914195 | 0.360302  | O                  | -0.806279 | -1.948317 | 0.167055  |
| H                              | 2.893132  | -0.876232 | 0.984489  | H                  | -2.354251 | -1.897188 | -0.909130 | H                  | -2.417230 | -1.582676 | -1.078637 |
| H                              | 3.348228  | -1.133750 | -0.771475 | H                  | -2.751314 | -2.108130 | 0.866784  | H                  | -2.847290 | -2.094670 | 0.623809  |
| H                              | 2.426203  | 2.567225  | -0.275117 | H                  | -1.708023 | 2.700735  | 0.250959  | H                  | -1.703575 | 2.716536  | 0.513177  |
| H                              | 1.285646  | 2.423219  | 1.085337  | H                  | -3.181449 | 1.772028  | 0.460747  | H                  | -3.171912 | 1.747671  | 0.491575  |
| H                              | 0.750192  | 3.030908  | -0.503878 | H                  | -2.428073 | 1.875245  | -1.156520 | H                  | -2.216092 | 1.934043  | -1.002841 |
| N                              | -1.670926 | -1.806494 | 0.308882  | N                  | 2.340799  | -1.123966 | -0.205528 | N                  | 2.429330  | -0.993544 | -0.383612 |
| H                              | -1.057869 | -2.592132 | 0.529639  | H                  | 2.137265  | -2.107807 | -0.380636 | H                  | 2.328624  | -2.006313 | -0.444151 |
| H                              | -2.240355 | -2.109043 | -0.480242 | H                  | 2.923480  | -1.104662 | 0.630193  | H                  | 3.138901  | -0.828565 | 0.329136  |
| H                              | -2.314852 | -1.733425 | 1.096268  | H                  | 2.949977  | -0.830175 | -0.968288 | H                  | 2.861528  | -0.712144 | -1.262726 |
| H                              | 1.477861  | -2.248219 | -0.982824 | H                  | -0.602176 | -2.398415 | 1.187399  | H                  | -0.721051 | -2.619638 | 0.857867  |
| N                              | 0.018578  | -0.148853 | 1.961668  | N                  | 0.080571  | -0.406407 | -2.154800 | N                  | -0.046888 | -0.195316 | -2.137682 |
| H                              | 0.708656  | 0.567147  | 2.189455  | H                  | -0.810133 | 0.008707  | -2.425292 | H                  | -0.932374 | 0.251269  | -2.374971 |
| H                              | 0.457809  | -1.040796 | 2.193395  | H                  | -0.014991 | -1.408138 | -2.318917 | H                  | -0.157270 | -1.182734 | -2.368306 |
| H                              | -0.737906 | -0.026958 | 2.634523  | H                  | 0.757776  | -0.077652 | -2.841746 | H                  | 0.631383  | 0.171728  | -2.804206 |
| N                              | -0.895373 | -0.103309 | -1.991743 | N                  | 0.758170  | 0.276231  | 2.200752  | N                  | 0.837198  | -0.133059 | 2.173093  |
| H                              | -0.225666 | 0.531715  | -2.428052 | H                  | -0.136394 | 0.576439  | 2.587365  | H                  | -0.054484 | 0.099102  | 2.610523  |
| H                              | -1.822936 | 0.220183  | -2.264944 | H                  | 1.434844  | 0.984888  | 2.480177  | H                  | 1.513571  | 0.532585  | 2.545461  |
| H                              | -0.774475 | -1.000722 | -2.460062 | H                  | 1.018960  | -0.560864 | 2.719342  | H                  | 1.116268  | -1.038184 | 2.548668  |
| N                              | -1.816432 | 1.621223  | 0.304327  | N                  | 1.266460  | 2.060914  | -0.387925 | N                  | 1.224949  | 2.094893  | -0.235796 |
| H                              | -1.526966 | 2.211654  | 1.083241  | H                  | 0.964508  | 2.716800  | 0.331994  | H                  | 1.135285  | 2.623074  | 0.631459  |

|                                       |           |           |           |                    |           |           |           |                    |           |           |           |
|---------------------------------------|-----------|-----------|-----------|--------------------|-----------|-----------|-----------|--------------------|-----------|-----------|-----------|
| H                                     | -2.786477 | 1.372044  | 0.496806  | H                  | 0.937485  | 2.455152  | -1.268168 | H                  | 0.666879  | 2.607848  | -0.918157 |
| H                                     | -1.850044 | 2.239090  | -0.505703 | H                  | 2.282750  | 2.133957  | -0.411807 | H                  | 2.193513  | 2.208243  | -0.531129 |
| <b>Structure (TS<sub>8-9</sub>)</b>   |           |           |           |                    |           |           |           |                    |           |           |           |
| E = -1720.0962587                     |           |           |           | E = -1720.11399294 |           |           |           | E = -1720.11068579 |           |           |           |
| Fe                                    | 0.083826  | -0.408203 | -0.028703 | Fe                 | 0.014584  | 0.352787  | -0.002142 | Fe                 | 0.034537  | 0.367853  | -0.002608 |
| C                                     | -2.723768 | 1.490051  | -0.048849 | C                  | 2.755122  | -1.576921 | 0.015439  | C                  | -2.895935 | -1.624099 | 0.115739  |
| O                                     | -1.839913 | 0.598332  | 0.552832  | O                  | 1.475248  | -1.220448 | 0.422427  | O                  | -1.844221 | -0.791589 | -0.264916 |
| H                                     | -3.508758 | 1.077427  | -0.670399 | H                  | 3.585703  | -0.990323 | 0.387215  | H                  | -3.842513 | -1.469414 | -0.383997 |
| H                                     | -2.405638 | 2.519128  | -0.157953 | H                  | 2.849582  | -2.173833 | -0.883378 | H                  | -2.842954 | -2.090390 | 1.090470  |
| H                                     | -2.763777 | 1.071174  | 1.166359  | H                  | 2.060312  | -2.142785 | 0.939940  | H                  | -1.951423 | -1.908975 | -0.704714 |
| N                                     | 2.122882  | -1.224186 | -0.399224 | N                  | -1.616339 | 1.743447  | -0.572505 | N                  | 1.896212  | 1.536196  | 0.335655  |
| H                                     | 2.542929  | -1.022973 | -1.305255 | H                  | -2.223859 | 1.312063  | -1.268767 | H                  | 2.507676  | 1.047623  | 0.989140  |
| H                                     | 2.178288  | -2.237026 | -0.300435 | H                  | -1.302657 | 2.618900  | -0.988806 | H                  | 1.740786  | 2.458270  | 0.740123  |
| H                                     | 2.771140  | -0.849162 | 0.292532  | H                  | -2.229899 | 2.010068  | 0.196060  | H                  | 2.461045  | 1.695877  | -0.497214 |
| N                                     | -0.052971 | 0.376875  | -1.899349 | N                  | 0.562475  | 0.085514  | -2.129628 | N                  | -0.410473 | 0.455643  | 2.170976  |
| H                                     | -1.012823 | 0.603988  | -2.161565 | H                  | 1.473174  | -0.345583 | -2.280931 | H                  | -1.302873 | 0.022766  | 2.403187  |
| H                                     | 0.293842  | -0.238899 | -2.634459 | H                  | 0.565643  | 0.940034  | -2.684360 | H                  | -0.460184 | 1.402718  | 2.543351  |
| O                                     | 0.469415  | 1.247198  | -1.998828 | H                  | -0.114651 | -0.532675 | -2.575567 | H                  | 0.290123  | -0.023182 | 2.735247  |
| N                                     | 0.139778  | -1.091728 | 1.879778  | N                  | -0.483851 | 0.312047  | 2.146641  | N                  | 0.355322  | -0.021864 | -2.153466 |
| H                                     | 0.315136  | -2.088111 | 2.002504  | H                  | -0.693255 | 1.193771  | 2.611964  | H                  | 0.924406  | 0.644545  | -2.672983 |
| H                                     | -0.738899 | -0.900553 | 2.361460  | H                  | 0.273259  | -0.114392 | 2.678858  | H                  | -0.536605 | -0.068862 | -2.644838 |
| H                                     | 0.865480  | -0.615681 | 2.415658  | H                  | -1.296261 | -0.284291 | 2.298016  | H                  | 0.794831  | -0.931146 | -2.289946 |
| N                                     | -1.109305 | -2.039421 | -0.583773 | N                  | 1.538567  | 1.909275  | 0.369910  | N                  | -1.198296 | 2.129176  | -0.521069 |
| H                                     | -0.730347 | -2.947480 | -0.317850 | H                  | 1.168876  | 2.791135  | 0.722840  | H                  | -0.766471 | 2.819687  | -1.133366 |
| H                                     | -1.341682 | -2.121034 | -1.572317 | H                  | 2.080016  | 2.151989  | -0.458395 | H                  | -1.532128 | 2.651131  | 0.287614  |
| H                                     | -1.998802 | -1.950515 | -0.092680 | H                  | 2.218461  | 1.599435  | 1.063249  | H                  | -2.037364 | 1.807339  | -1.002450 |
| O                                     | 0.968305  | 1.350129  | 0.683181  | O                  | -1.324204 | -1.338604 | -0.255860 | O                  | 1.148172  | -1.472553 | 0.403947  |
| C                                     | 1.920179  | 2.215014  | 0.032394  | C                  | -2.730098 | -1.483826 | 0.029376  | C                  | 2.479705  | -1.781797 | -0.058056 |
| H                                     | 2.473891  | 1.840534  | 1.352052  | H                  | -0.907003 | -2.207129 | -0.318680 | H                  | 0.783775  | -2.232401 | 0.874251  |
| H                                     | 2.488038  | 1.601025  | -0.662507 | H                  | -3.116693 | -0.493306 | 0.256100  | H                  | 2.802697  | -0.948731 | -0.678054 |
| H                                     | 2.600716  | 2.640707  | 0.764819  | H                  | -2.880014 | -2.131763 | 0.890322  | H                  | 2.475634  | -2.691585 | -0.653826 |
| H                                     | 1.414093  | 3.014678  | -0.506250 | H                  | -3.254385 | -1.888875 | -0.832330 | H                  | 3.159993  | -1.895004 | 0.782806  |
| <b>Structure (TS<sub>10-11</sub>)</b> |           |           |           |                    |           |           |           |                    |           |           |           |
| E = -1720.1212291                     |           |           |           | E = -1720.1101627  |           |           |           | Not available      |           |           |           |
| Fe                                    | 0.043072  | 0.303868  | 0.015420  | Fe                 | 0.051332  | 0.318916  | 0.025912  |                    |           |           |           |
| H                                     | -0.890342 | -2.448576 | 0.761719  | H                  | -0.709013 | -2.539237 | 0.703255  |                    |           |           |           |
| O                                     | 1.070730  | -1.057358 | -0.735746 | O                  | 1.013458  | -0.986961 | -0.927646 |                    |           |           |           |
| C                                     | -1.157725 | -1.386378 | 0.654213  | C                  | -1.010167 | -1.480668 | 0.701082  |                    |           |           |           |
| C                                     | 2.283426  | -1.602169 | -0.234401 | C                  | 2.142298  | -1.723655 | -0.459383 |                    |           |           |           |
| O                                     | -2.367013 | -1.217634 | -0.033385 | O                  | -2.299772 | -1.277330 | 0.222022  |                    |           |           |           |
| H                                     | -0.036274 | -1.402896 | -0.110701 | H                  | -0.045570 | -1.406394 | -0.226103 |                    |           |           |           |
| H                                     | -1.210877 | -0.994651 | 1.674337  | H                  | -0.872924 | -1.122317 | 1.725852  |                    |           |           |           |
| H                                     | 2.137830  | -2.103402 | 0.726118  | H                  | 1.922465  | -2.246905 | 0.475930  |                    |           |           |           |
| H                                     | 3.048760  | -0.827884 | -0.130662 | H                  | 2.999758  | -1.065783 | -0.316389 |                    |           |           |           |
| H                                     | 2.641456  | -2.338575 | -0.950600 | H                  | 2.386522  | -2.463667 | -1.219362 |                    |           |           |           |
| N                                     | 1.249093  | 1.841397  | -0.643117 | N                  | 1.170817  | 1.903563  | -0.755072 |                    |           |           |           |
| H                                     | 1.778596  | 2.343457  | 0.069195  | H                  | 1.846375  | 2.337262  | -0.126293 |                    |           |           |           |
| H                                     | 0.790149  | 2.560621  | -1.202004 | H                  | 0.629736  | 2.667215  | -1.158840 |                    |           |           |           |
| H                                     | 1.938873  | 1.405619  | -1.259535 | H                  | 1.710633  | 1.494107  | -1.520053 |                    |           |           |           |
| N                                     | -0.909788 | 0.272771  | -1.748640 | N                  | -1.198188 | 0.388644  | -1.831226 |                    |           |           |           |
| H                                     | -1.182914 | 1.154520  | -2.179536 | H                  | -1.566129 | 1.265644  | -2.194994 |                    |           |           |           |
| H                                     | -1.757482 | -0.292993 | -1.625962 | H                  | -2.002165 | -0.221887 | -1.677538 |                    |           |           |           |
| H                                     | -0.310071 | -0.222644 | -2.411035 | H                  | -0.656938 | -0.033893 | -2.585491 |                    |           |           |           |
| N                                     | 1.085402  | 0.281299  | 1.773804  | N                  | 1.393497  | 0.335301  | 1.858125  |                    |           |           |           |
| H                                     | 0.962328  | 1.108728  | 2.358293  | H                  | 2.362736  | 0.195662  | 1.570938  |                    |           |           |           |
| H                                     | 2.086576  | 0.213854  | 1.584117  | H                  | 1.212507  | -0.402070 | 2.539670  |                    |           |           |           |
| H                                     | 0.872939  | -0.517509 | 2.373229  | H                  | 1.390372  | 1.202966  | 2.394957  |                    |           |           |           |

|   |           |           |          |   |           |           |          |  |
|---|-----------|-----------|----------|---|-----------|-----------|----------|--|
| N | -1.440247 | 1.513292  | 0.734973 | N | -1.421492 | 1.449335  | 0.937282 |  |
| H | -1.442482 | 1.670163  | 1.742991 | H | -1.331205 | 1.559435  | 1.947725 |  |
| H | -2.321635 | 1.037200  | 0.520299 | H | -2.293449 | 0.935687  | 0.779546 |  |
| H | -1.492686 | 2.439696  | 0.312326 | H | -1.550372 | 2.387022  | 0.559700 |  |
| H | -3.007785 | -1.915382 | 0.161513 | H | -2.882688 | -2.032304 | 0.384794 |  |



**Table S3.** MN15 Cartesian coordinates (in Å) and equilibrium energies (E/a.u.) of the optimized geometries for all ruthenium structures shown in Figure 2 for three different multiplicities.

| <b>S=1/2</b>         |           |           |           | <b>S=3/2</b>       |           |           |           | <b>S=5/2</b>       |           |           |           |
|----------------------|-----------|-----------|-----------|--------------------|-----------|-----------|-----------|--------------------|-----------|-----------|-----------|
| <b>Structure (1)</b> |           |           |           |                    |           |           |           |                    |           |           |           |
| E = -435.043047938   |           |           |           | E = -435.022713106 |           |           |           | E = -434.955651165 |           |           |           |
| Ru                   | 0.142535  | 0.065665  | -0.006731 | Ru                 | 0.169426  | 0.000663  | -0.149363 | Ru                 | 0.184217  | 0.000231  | 0.000004  |
| O                    | -1.560292 | 0.675461  | -0.014207 | O                  | -1.621547 | -0.000800 | 0.191775  | O                  | -1.702777 | -0.000843 | -0.000328 |
| C                    | -2.889743 | 0.173642  | 0.001039  | C                  | -2.938802 | -0.006705 | -0.337920 | C                  | -3.113750 | -0.001691 | -0.000337 |
| H                    | -3.562976 | 1.016604  | 0.142545  | H                  | -3.642697 | 0.008530  | 0.490742  | H                  | -3.476025 | 0.509687  | -0.892886 |
| H                    | -3.027942 | -0.527338 | 0.825034  | H                  | -3.089641 | -0.905094 | -0.937375 | H                  | -3.476032 | 0.515247  | 0.888984  |
| H                    | -3.120032 | -0.300468 | -0.953754 | H                  | -3.085953 | 0.870917  | -0.968208 | H                  | -3.475048 | -1.030683 | 0.002886  |
| N                    | 0.730760  | 2.121402  | -0.004972 | N                  | 0.146717  | 2.142222  | -0.238421 | N                  | 0.274711  | -0.973867 | -2.111061 |
| H                    | 1.172740  | 2.469268  | -0.855967 | H                  | 0.134845  | 2.511323  | -1.190259 | H                  | 0.924764  | -1.752587 | -2.213442 |
| H                    | 1.301206  | 2.455688  | 0.771467  | H                  | 0.901494  | 2.623121  | 0.250881  | H                  | 0.497526  | -0.310891 | -2.853738 |
| H                    | -0.162874 | 2.615209  | 0.067327  | H                  | -0.718497 | 2.464068  | 0.198193  | H                  | -0.653398 | -1.338883 | -2.323750 |
| N                    | 1.632885  | -0.561855 | -1.412901 | N                  | 2.199947  | -0.005071 | -0.918180 | N                  | 2.540672  | 0.001030  | 0.000649  |
| H                    | 2.464497  | 0.031345  | -1.429318 | H                  | 2.692972  | 0.881752  | -0.806290 | H                  | 2.940430  | 0.443101  | -0.827113 |
| H                    | 1.234724  | -0.490721 | -2.351826 | H                  | 2.214128  | -0.201628 | -1.921352 | H                  | 2.941964  | -0.936288 | 0.031985  |
| H                    | 1.975446  | -1.519536 | -1.326170 | H                  | 2.803716  | -0.706952 | -0.487582 | H                  | 2.940439  | 0.497486  | 0.797025  |
| N                    | -0.698448 | -1.914087 | -0.019658 | N                  | 0.153006  | -2.141769 | -0.225784 | N                  | 0.273731  | -1.341544 | 1.898729  |
| H                    | -1.413649 | -1.992573 | -0.744483 | H                  | 0.081321  | -2.512900 | -1.174159 | H                  | 0.474192  | -2.320013 | 1.690927  |
| H                    | -1.178172 | -2.124151 | 0.856925  | H                  | -0.680125 | -2.467237 | 0.266876  | H                  | -0.648562 | -1.326024 | 2.333482  |
| H                    | -0.056510 | -2.690284 | -0.180927 | H                  | 0.941286  | -2.618419 | 0.211979  | H                  | 0.939245  | -1.055743 | 2.616272  |
| N                    | 1.552973  | -0.550677 | 1.474681  | N                  | 0.701108  | 0.009370  | 2.163665  | N                  | 0.270495  | 2.315690  | 0.212126  |
| H                    | 2.447735  | -0.058902 | 1.436034  | H                  | 1.230655  | 0.807350  | 2.510416  | H                  | 0.938706  | 2.795597  | -0.390074 |
| H                    | 1.780721  | -1.545559 | 1.489760  | H                  | 1.169779  | -0.818084 | 2.528478  | H                  | 0.464823  | 2.624755  | 1.164736  |
| H                    | 1.167129  | -0.336887 | 2.396881  | H                  | -0.208297 | 0.047460  | 2.623975  | H                  | -0.651121 | 2.682795  | -0.023941 |
| <b>Structure (2)</b> |           |           |           |                    |           |           |           |                    |           |           |           |
| E = -475.535372054   |           |           |           | E = -475.501572924 |           |           |           | E = -475.433940078 |           |           |           |
| Ru                   | -0.142825 | -0.073782 | -0.012603 | Ru                 | 0.255330  | -0.066484 | 0.012012  | Ru                 | 0.240188  | -0.267337 | 0.000637  |
| H                    | -1.567393 | 2.944283  | 1.144742  | H                  | -3.750593 | -1.775030 | 0.525261  | H                  | -2.876139 | -0.088332 | 0.059698  |
| O                    | 1.412640  | 0.542275  | 0.852651  | O                  | -0.490433 | 1.599590  | -0.043897 | O                  | 0.855466  | 1.517840  | -0.012641 |
| C                    | -1.623336 | 1.983282  | 0.634057  | C                  | -2.738699 | -1.482725 | 0.257643  | C                  | -3.084629 | 0.983741  | -0.000373 |
| C                    | 2.713322  | 0.591442  | 0.315973  | C                  | -1.718575 | 2.304939  | 0.040584  | C                  | 1.246316  | 2.873044  | -0.019069 |
| H                    | -2.431011 | 1.402147  | 1.067555  | H                  | -2.132024 | -1.479992 | 1.165895  | H                  | -3.714420 | 1.177364  | -0.864976 |
| H                    | -0.612670 | 1.576205  | 0.888783  | H                  | -2.768390 | -0.484041 | -0.180195 | H                  | -2.160514 | 1.559526  | -0.090188 |
| H                    | -1.781586 | 2.173746  | -0.422993 | H                  | -2.352634 | -2.205848 | -0.461904 | H                  | -3.618514 | 1.291867  | 0.894928  |
| H                    | 3.033084  | 1.633555  | 0.239385  | H                  | -2.281866 | 1.972894  | 0.913368  | H                  | 0.361695  | 3.506918  | -0.093891 |
| H                    | 2.781341  | 0.127048  | -0.674764 | H                  | -2.308220 | 2.117263  | -0.859245 | H                  | 1.900311  | 3.056927  | -0.872151 |
| H                    | 3.405697  | 0.091850  | 0.995922  | H                  | -1.502807 | 3.368290  | 0.114052  | H                  | 1.780982  | 3.100362  | 0.903779  |
| N                    | 0.837961  | -1.807604 | -0.639695 | N                  | 2.424955  | 0.768294  | -0.530330 | N                  | -0.748655 | 0.019160  | 2.094169  |
| H                    | 0.290631  | -2.665290 | -0.553476 | H                  | 3.161103  | 0.629580  | 0.159538  | H                  | -1.597716 | -0.518553 | 2.263328  |
| H                    | 1.669773  | -1.938934 | -0.059596 | H                  | 2.285915  | 1.776152  | -0.601460 | H                  | -1.011114 | 1.002321  | 2.162485  |
| H                    | 1.169221  | -1.784041 | -1.604945 | H                  | 2.816963  | 0.471536  | -1.422110 | H                  | -0.117347 | -0.167237 | 2.873300  |
| N                    | -0.616129 | -0.934361 | 1.884133  | N                  | 0.613096  | 0.166642  | 2.115717  | N                  | -0.730861 | -0.040158 | -2.109006 |
| H                    | -0.650813 | -1.949744 | 1.972173  | H                  | 1.531002  | -0.122235 | 2.453382  | H                  | -0.310080 | -0.597313 | -2.852098 |
| H                    | -1.485725 | -0.586538 | 2.289145  | H                  | -0.075882 | -0.305707 | 2.702299  | H                  | -0.626592 | 0.936375  | -2.383158 |
| H                    | 0.133993  | -0.615646 | 2.502563  | H                  | 0.533522  | 1.161093  | 2.333424  | H                  | -1.731389 | -0.236805 | -2.117376 |
| N                    | 0.402139  | 0.948228  | -1.815237 | N                  | -0.264831 | -0.353895 | -2.046549 | N                  | 2.383993  | -1.153358 | 0.026902  |
| H                    | 0.943405  | 0.415640  | -2.496969 | H                  | 0.412489  | -0.842988 | -2.631351 | H                  | 2.555064  | -1.870788 | 0.730841  |
| H                    | 0.990251  | 1.744594  | -1.560517 | H                  | -0.395361 | 0.563544  | -2.475307 | H                  | 3.032558  | -0.391142 | 0.222783  |
| H                    | -0.383122 | 1.341917  | -2.335501 | H                  | -1.153608 | -0.846927 | -2.149276 | H                  | 2.672822  | -1.551850 | -0.866477 |
| N                    | -2.035050 | -0.755684 | -0.891710 | N                  | 0.777944  | -2.170207 | 0.158712  | N                  | -0.676949 | -2.441613 | 0.013132  |
| H                    | -2.710936 | 0.007840  | -0.950637 | H                  | -0.073617 | -2.723829 | 0.279602  | H                  | -0.361279 | -3.019493 | -0.765643 |
| H                    | -2.501818 | -1.473005 | -0.335685 | H                  | 1.379993  | -2.405324 | 0.948619  | H                  | -1.695372 | -2.427924 | -0.048639 |

|                      |           |           |           |                    |           |           |           |               |           |           |          |
|----------------------|-----------|-----------|-----------|--------------------|-----------|-----------|-----------|---------------|-----------|-----------|----------|
| H                    | -1.971533 | -1.139839 | -1.834483 | H                  | 1.248469  | -2.548959 | -0.664132 | H             | -0.457755 | -2.971045 | 0.856820 |
| <b>Structure (3)</b> |           |           |           |                    |           |           |           |               |           |           |          |
| E = -475.544534188   |           |           |           | E = -475.481066068 |           |           |           | Not available |           |           |          |
| Ru                   | 0.243074  | -0.010150 | 0.010773  | Ru                 | 0.291540  | 0.055801  | -0.052101 |               |           |           |          |
| H                    | -0.348556 | -1.579542 | 2.003447  | H                  | 0.297258  | -1.262701 | -2.351126 |               |           |           |          |
| O                    | -1.667847 | 0.402245  | 0.719578  | O                  | -1.654249 | -0.539326 | -0.664385 |               |           |           |          |
| C                    | 0.603120  | -1.363422 | 1.507085  | C                  | 0.889784  | -0.443937 | -1.938582 |               |           |           |          |
| C                    | -2.920950 | -0.036911 | 0.137179  | C                  | -2.948670 | -0.294157 | -0.064653 |               |           |           |          |
| H                    | 1.308798  | -1.018103 | 2.265344  | H                  | 1.947204  | -0.698419 | -2.011303 |               |           |           |          |
| H                    | -1.767614 | 0.525520  | 1.674052  | H                  | -1.746721 | -0.865816 | -1.571206 |               |           |           |          |
| H                    | 0.967450  | -2.316943 | 1.113550  | H                  | 0.708823  | 0.458769  | -2.535624 |               |           |           |          |
| H                    | -3.131448 | -1.064485 | 0.426422  | H                  | -3.507493 | 0.417996  | -0.666865 |               |           |           |          |
| H                    | -2.816457 | 0.047371  | -0.940725 | H                  | -2.768186 | 0.117683  | 0.924285  |               |           |           |          |
| H                    | -3.719345 | 0.617634  | 0.474284  | H                  | -3.497893 | -1.227759 | 0.020061  |               |           |           |          |
| N                    | -0.149977 | 1.511022  | -1.705445 | N                  | -0.192526 | 0.073160  | 2.207965  |               |           |           |          |
| H                    | 0.581416  | 2.207086  | -1.845053 | H                  | 0.616141  | -0.085317 | 2.807846  |               |           |           |          |
| H                    | -0.987960 | 2.047663  | -1.480335 | H                  | -0.871609 | -0.641044 | 2.467716  |               |           |           |          |
| H                    | -0.319352 | 1.111462  | -2.627303 | H                  | -0.589466 | 0.961962  | 2.511640  |               |           |           |          |
| N                    | 0.950836  | 1.549785  | 1.292945  | N                  | 0.660854  | -2.335252 | 0.437819  |               |           |           |          |
| H                    | 1.753225  | 2.078385  | 0.950579  | H                  | 1.106871  | -2.609337 | 1.311654  |               |           |           |          |
| H                    | 1.234957  | 1.166344  | 2.195855  | H                  | 1.225887  | -2.737643 | -0.308447 |               |           |           |          |
| H                    | 0.238709  | 2.253579  | 1.491881  | H                  | -0.232174 | -2.824463 | 0.407166  |               |           |           |          |
| N                    | -0.483780 | -1.672418 | -1.136077 | N                  | -0.671958 | 2.337487  | -0.199734 |               |           |           |          |
| H                    | -0.994218 | -1.444083 | -1.988644 | H                  | -0.174808 | 3.082193  | 0.286209  |               |           |           |          |
| H                    | -1.117783 | -2.231193 | -0.563117 | H                  | -1.639861 | 2.394537  | 0.113204  |               |           |           |          |
| H                    | 0.251146  | -2.322432 | -1.416455 | H                  | -0.683795 | 2.607092  | -1.183090 |               |           |           |          |
| N                    | 2.209189  | -0.390088 | -0.667316 | N                  | 2.288035  | 0.831070  | 0.221016  |               |           |           |          |
| H                    | 2.586868  | -1.189325 | -0.154513 | H                  | 2.599026  | 1.325137  | -0.616790 |               |           |           |          |
| H                    | 2.867510  | 0.372313  | -0.505264 | H                  | 2.952894  | 0.065641  | 0.344323  |               |           |           |          |
| H                    | 2.283285  | -0.618712 | -1.658983 | H                  | 2.426628  | 1.464171  | 1.007815  |               |           |           |          |
| <b>Structure (4)</b> |           |           |           |                    |           |           |           |               |           |           |          |
| E = -585.194381095   |           |           |           | E = -585.175469858 |           |           |           | Not available |           |           |          |
| Ru                   | -0.301759 | 0.048173  | 0.075738  | Ru                 | -0.348535 | -0.011913 | 0.020949  |               |           |           |          |
| O                    | 1.162275  | 1.046163  | 0.510186  | O                  | 1.129190  | -0.078552 | 1.167566  |               |           |           |          |
| O                    | 2.812615  | -0.151283 | -0.468336 | O                  | 2.810274  | 0.268257  | -0.279260 |               |           |           |          |
| O                    | 2.511828  | 0.381348  | 0.611788  | O                  | 2.441871  | -0.496993 | 0.629407  |               |           |           |          |
| C                    | -1.372311 | -0.404018 | 1.715310  | C                  | -1.158163 | -1.847061 | 0.510209  |               |           |           |          |
| H                    | -1.378987 | -1.438637 | 2.046917  | H                  | -1.517379 | -2.366235 | -0.377045 |               |           |           |          |
| H                    | -2.348551 | 0.063586  | 1.812580  | H                  | -1.976095 | -1.714367 | 1.217711  |               |           |           |          |
| H                    | -0.613023 | 0.171014  | 2.285837  | H                  | -0.360412 | -2.421894 | 0.980696  |               |           |           |          |
| N                    | -2.169317 | -0.889022 | -0.716929 | N                  | -2.179913 | 0.223016  | -1.132981 |               |           |           |          |
| H                    | -2.338555 | -1.820268 | -0.335134 | H                  | -2.055779 | 0.132125  | -2.142772 |               |           |           |          |
| H                    | -2.235464 | -0.992197 | -1.729678 | H                  | -2.629767 | 1.130449  | -0.999823 |               |           |           |          |
| H                    | -2.988037 | -0.344328 | -0.444607 | H                  | -2.875595 | -0.478546 | -0.873687 |               |           |           |          |
| N                    | 0.665106  | -1.836022 | 0.387827  | N                  | 0.634270  | -1.099747 | -1.522761 |               |           |           |          |
| H                    | 1.161324  | -1.811324 | 1.282025  | H                  | 1.174992  | -1.851633 | -1.085298 |               |           |           |          |
| H                    | 1.383356  | -2.057275 | -0.304036 | H                  | 1.316767  | -0.546635 | -2.045302 |               |           |           |          |
| H                    | 0.046943  | -2.646239 | 0.438984  | H                  | 0.021263  | -1.558471 | -2.198044 |               |           |           |          |
| N                    | -1.194542 | 1.988676  | -0.065311 | N                  | -1.236409 | 0.823209  | 1.766612  |               |           |           |          |
| H                    | -0.446701 | 2.681072  | 0.031207  | H                  | -0.820715 | 0.320811  | 2.556958  |               |           |           |          |
| H                    | -1.843020 | 2.174106  | 0.702153  | H                  | -2.248413 | 0.738362  | 1.866514  |               |           |           |          |
| H                    | -1.696912 | 2.226267  | -0.920526 | H                  | -0.995478 | 1.804530  | 1.918640  |               |           |           |          |
| N                    | 0.138832  | -0.093084 | -1.988496 | N                  | 0.317652  | 2.023537  | -0.834959 |               |           |           |          |
| H                    | 1.113415  | 0.224633  | -2.042710 | H                  | 1.253965  | 2.162397  | -0.449291 |               |           |           |          |
| H                    | -0.404149 | 0.504586  | -2.612776 | H                  | -0.227945 | 2.846281  | -0.577253 |               |           |           |          |
| H                    | 0.125311  | -1.034164 | -2.383318 | H                  | 0.425229  | 2.077578  | -1.848105 |               |           |           |          |

| Structure (5)      |           |           |                    |    |           |                    |           |    |           |           |           |
|--------------------|-----------|-----------|--------------------|----|-----------|--------------------|-----------|----|-----------|-----------|-----------|
| E = -585.23946055  |           |           | E = -585.239364912 |    |           | Not available      |           |    |           |           |           |
| Ru                 | -0.493145 | -0.026843 | -0.143170          | Ru | 0.500324  | 0.025178           | -0.146529 |    |           |           |           |
| O                  | 0.408747  | -0.382022 | -1.491902          | O  | -0.364773 | 0.363109           | -1.523540 |    |           |           |           |
| O                  | 3.175198  | -0.008382 | 0.084245           | O  | -3.197395 | 0.018414           | 0.089793  |    |           |           |           |
| O                  | 4.329445  | -0.158404 | -0.187866          | O  | -4.352010 | 0.147895           | -0.191530 |    |           |           |           |
| C                  | -2.002259 | 1.150324  | -0.952711          | C  | 2.020860  | -1.175897          | -0.897643 |    |           |           |           |
| H                  | -2.068718 | 2.105537  | -0.436703          | H  | 2.067345  | -2.122800          | -0.364432 |    |           |           |           |
| H                  | -2.958196 | 0.631987  | -0.921304          | H  | 2.979392  | -0.663583          | -0.850265 |    |           |           |           |
| H                  | -1.696871 | 1.309944  | -1.985737          | H  | 1.740628  | -1.350421          | -1.935383 |    |           |           |           |
| N                  | -1.810913 | 0.488906  | 1.685853           | N  | 1.767876  | -0.471607          | 1.723057  |    |           |           |           |
| H                  | -1.586795 | 1.409846  | 2.065935           | H  | 1.532167  | -1.388477          | 2.105925  |    |           |           |           |
| H                  | -1.794854 | -0.144039 | 2.485941           | H  | 1.731614  | 0.169163           | 2.516212  |    |           |           |           |
| H                  | -2.791129 | 0.557084  | 1.409913           | H  | 2.754941  | -0.544015          | 1.473915  |    |           |           |           |
| N                  | 0.658700  | 1.759167  | 0.105512           | N  | -0.670029 | -1.748846          | 0.104454  |    |           |           |           |
| H                  | 1.290475  | 1.800398  | -0.698319          | H  | -1.292920 | -1.793311          | -0.706021 |    |           |           |           |
| H                  | 1.257688  | 1.817756  | 0.929320           | H  | -1.278327 | -1.795640          | 0.922173  |    |           |           |           |
| H                  | 0.103079  | 2.615001  | 0.075887           | H  | -0.119996 | -2.608666          | 0.088820  |    |           |           |           |
| N                  | -1.697399 | -1.744991 | -0.576797          | N  | 1.727648  | 1.727106           | -0.579543 |    |           |           |           |
| H                  | -2.149689 | -1.602546 | -1.482094          | H  | 2.196900  | 1.567415           | -1.473271 |    |           |           |           |
| H                  | -2.442299 | -1.964101 | 0.084652           | H  | 2.460917  | 1.949638           | 0.093671  |    |           |           |           |
| H                  | -1.134675 | -2.590720 | -0.682355          | H  | 1.174675  | 2.575943           | -0.708951 |    |           |           |           |
| N                  | 0.563773  | -1.024437 | 1.466865           | N  | -0.585288 | 1.059632           | 1.419976  |    |           |           |           |
| H                  | 1.444193  | -1.346027 | 1.052973           | H  | -1.446983 | 1.392552           | 0.976918  |    |           |           |           |
| H                  | 0.106328  | -1.848814 | 1.856945           | H  | -0.124164 | 1.879581           | 1.814953  |    |           |           |           |
| H                  | 0.827130  | -0.432227 | 2.254822           | H  | -0.883617 | 0.480818           | 2.205457  |    |           |           |           |
| Structure (6)      |           |           |                    |    |           |                    |           |    |           |           |           |
| E = -475.483168465 |           |           | E = -475.46349305  |    |           | E = -475.411077982 |           |    |           |           |           |
| Ru                 | -0.550254 | -0.006858 | -0.164870          | Ru | 0.569909  | 0.023822           | 0.109527  | Ru | 0.665082  | -0.097350 | -0.031438 |
| H                  | 3.168283  | -2.091935 | 0.906565           | H  | -3.309635 | -2.101710          | -0.300139 | H  | -3.798482 | -1.972434 | 0.954499  |
| O                  | 1.320153  | 0.991295  | -0.018839          | O  | -1.286982 | 0.993412           | -0.216681 | O  | -1.571446 | 0.684143  | 0.074783  |
| C                  | 3.562577  | -1.130239 | 0.616347           | C  | -3.608941 | -1.077383          | -0.459491 | C  | -3.965267 | -1.391256 | 0.061867  |
| C                  | 1.652487  | 2.083527  | -0.905429          | C  | -1.775319 | 1.954606           | 0.745207  | C  | -2.017197 | 2.051681  | 0.049138  |
| H                  | 3.813584  | -0.420429 | 1.389679           | H  | -3.788971 | -0.738638          | -1.468356 | H  | -3.914358 | -1.869468 | -0.903402 |
| H                  | 2.100254  | 0.418793  | 0.120430           | H  | -2.018641 | 0.404322           | -0.489041 | H  | -2.340159 | 0.081283  | 0.112993  |
| H                  | 4.021160  | -1.027222 | -0.354924          | H  | -4.051088 | -0.531521          | 0.360049  | H  | -4.501838 | -0.458378 | 0.144668  |
| H                  | 2.529498  | 2.603477  | -0.529692          | H  | -2.633462 | 2.478137           | 0.332071  | H  | -2.580364 | 2.258845  | -0.859198 |
| H                  | 0.806171  | 2.765732  | -0.907182          | H  | -0.972333 | 2.663141           | 0.929029  | H  | -1.129065 | 2.680740  | 0.077564  |
| H                  | 1.833239  | 1.719016  | -1.914649          | H  | -2.049460 | 1.460618           | 1.677273  | H  | -2.634824 | 2.272196  | 0.917432  |
| N                  | 0.384107  | -1.651761 | -1.192615          | N  | -0.332561 | -1.174411          | 1.660953  | N  | 0.751224  | 0.826407  | 2.066316  |
| H                  | -0.003992 | -2.577317 | -1.010256          | H  | 0.029429  | -2.120358          | 1.779283  | H  | 1.092430  | 0.208792  | 2.802182  |
| H                  | 1.377885  | -1.717947 | -0.961542          | H  | -1.339061 | -1.266814          | 1.511317  | H  | -0.204830 | 1.075649  | 2.318629  |
| H                  | 0.350891  | -1.545127 | -2.207644          | H  | -0.223967 | -0.719405          | 2.569032  | H  | 1.303729  | 1.680421  | 2.132799  |
| N                  | -0.067627 | -0.802423 | 1.686587           | N  | -0.016171 | -1.373871          | -1.723867 | N  | -0.402854 | -2.097554 | -0.297018 |
| H                  | -0.847275 | -0.854720 | 2.342748           | H  | 0.623424  | -2.138496          | -1.931360 | H  | -0.137968 | -2.596985 | -1.145396 |
| H                  | 0.645051  | -0.222089 | 2.134616           | H  | -0.090984 | -0.828790          | -2.581791 | H  | -1.418778 | -1.989665 | -0.329299 |
| H                  | 0.322798  | -1.744351 | 1.642079           | H  | -0.933098 | -1.799723          | -1.590408 | H  | -0.207767 | -2.734341 | 0.474846  |
| N                  | -1.376948 | 1.738351  | 0.781280           | N  | 1.434061  | 1.683427           | -0.945689 | N  | 0.721266  | 1.263167  | -1.860770 |
| H                  | -1.876589 | 2.354072  | 0.138148           | H  | 1.944596  | 2.313669           | -0.325707 | H  | 1.121196  | 2.177883  | -1.654248 |
| H                  | -0.622798 | 2.304608  | 1.172936           | H  | 0.691841  | 2.239403           | -1.373016 | H  | -0.229653 | 1.431423  | -2.188269 |
| H                  | -2.026531 | 1.576295  | 1.550705           | H  | 2.084857  | 1.444288           | -1.693977 | H  | 1.243217  | 0.900478  | -2.657789 |
| N                  | -2.470393 | -0.936300 | -0.317874          | N  | 2.487538  | -0.848300          | 0.464334  | N  | 2.892472  | -0.786929 | 0.055241  |
| H                  | -3.149459 | -0.607926 | 0.368522           | H  | 3.151964  | -0.697343          | -0.294314 | H  | 3.165551  | -1.258993 | -0.806100 |
| H                  | -2.457589 | -1.951157 | -0.218030          | H  | 2.463991  | -1.858524          | 0.600765  | H  | 3.083091  | -1.451351 | 0.803939  |
| H                  | -2.909008 | -0.765189 | -1.224673          | H  | 2.935963  | -0.468967          | 1.299132  | H  | 3.556853  | -0.024031 | 0.176736  |
| Structure (7)      |           |           |                    |    |           |                    |           |    |           |           |           |

| E = -550.75112222  |           |           |           | E = -550.692273377 |           |           |           | Not available |  |  |  |
|--------------------|-----------|-----------|-----------|--------------------|-----------|-----------|-----------|---------------|--|--|--|
| H                  | -2.796702 | -0.764599 | 0.962050  | H                  | -3.624317 | 1.048182  | 0.894280  |               |  |  |  |
| Ru                 | 0.328144  | -0.049307 | 0.007156  | Ru                 | 0.359575  | -0.279659 | 0.086317  |               |  |  |  |
| O                  | -0.923469 | 1.170092  | 0.728256  | O                  | 0.623179  | 1.491947  | 0.664026  |               |  |  |  |
| C                  | -2.483409 | -1.342094 | 0.096830  | C                  | -2.977231 | 1.059833  | 0.018595  |               |  |  |  |
| C                  | -1.605470 | 2.171199  | 0.011882  | C                  | 1.239448  | 2.519423  | -0.078796 |               |  |  |  |
| O                  | -1.058885 | -1.625358 | 0.182026  | O                  | -2.588696 | -0.274424 | -0.357757 |               |  |  |  |
| H                  | -2.641153 | -0.762675 | -0.807993 | H                  | -2.063251 | 1.604197  | 0.258714  |               |  |  |  |
| H                  | -3.024036 | -2.281157 | 0.027086  | H                  | -3.489712 | 1.564998  | -0.797882 |               |  |  |  |
| H                  | -2.002335 | 2.905367  | 0.710775  | H                  | 1.806591  | 3.153720  | 0.601629  |               |  |  |  |
| H                  | -2.453655 | 1.750322  | -0.541184 | H                  | 0.476377  | 3.144390  | -0.552777 |               |  |  |  |
| H                  | -0.947088 | 2.689195  | -0.696941 | H                  | 1.914098  | 2.126231  | -0.846961 |               |  |  |  |
| N                  | 1.794632  | -1.541301 | -0.654269 | N                  | -0.123266 | -2.340068 | -0.417167 |               |  |  |  |
| H                  | 1.307242  | -2.381014 | -0.970807 | H                  | -1.136522 | -2.387308 | -0.537542 |               |  |  |  |
| H                  | 2.435065  | -1.856332 | 0.073774  | H                  | 0.103508  | -3.020445 | 0.308273  |               |  |  |  |
| H                  | 2.384847  | -1.261406 | -1.437310 | H                  | 0.286998  | -2.702706 | -1.277031 |               |  |  |  |
| H                  | -0.911568 | -2.303307 | 0.854638  | H                  | -3.384754 | -0.772237 | -0.585454 |               |  |  |  |
| N                  | -0.351790 | 0.151292  | -2.016597 | N                  | -0.097642 | 0.340691  | -1.957393 |               |  |  |  |
| H                  | -1.101727 | 0.840863  | -2.084991 | H                  | 0.077390  | 1.333199  | -2.115503 |               |  |  |  |
| H                  | -0.743191 | -0.726658 | -2.361569 | H                  | -1.107290 | 0.194588  | -2.047261 |               |  |  |  |
| H                  | 0.345953  | 0.428893  | -2.706998 | H                  | 0.351986  | -0.165139 | -2.719611 |               |  |  |  |
| N                  | 0.824891  | -0.210936 | 2.075456  | N                  | -0.546151 | -0.440310 | 2.004032  |               |  |  |  |
| H                  | 0.116657  | 0.385160  | 2.513920  | H                  | -0.425355 | 0.479893  | 2.434983  |               |  |  |  |
| H                  | 1.732319  | 0.145503  | 2.373465  | H                  | -0.190440 | -1.138696 | 2.656564  |               |  |  |  |
| H                  | 0.741740  | -1.132492 | 2.502928  | H                  | -1.548183 | -0.606311 | 1.893247  |               |  |  |  |
| N                  | 1.694367  | 1.541458  | -0.241959 | N                  | 2.648394  | -0.563498 | -0.081657 |               |  |  |  |
| H                  | 1.365326  | 2.314954  | 0.339672  | H                  | 3.005401  | -1.480823 | 0.183482  |               |  |  |  |
| H                  | 1.758710  | 1.912881  | -1.189853 | H                  | 3.092346  | 0.111495  | 0.541337  |               |  |  |  |
| H                  | 2.652674  | 1.349913  | 0.051532  | H                  | 3.015315  | -0.375664 | -1.014103 |               |  |  |  |
| Structure (8)      |           |           |           |                    |           |           |           |               |  |  |  |
| E = -550.709279477 |           |           |           | E = -550.673711202 |           |           |           | Not available |  |  |  |
| Ru                 | 0.035212  | 0.226745  | -0.008743 | Ru                 | 0.756810  | -0.436772 | 0.118376  |               |  |  |  |
| C                  | 2.637126  | -1.543827 | 0.028607  | C                  | -3.617874 | -0.414399 | -0.493740 |               |  |  |  |
| O                  | 1.401136  | -1.343309 | 0.610826  | O                  | -3.097845 | 0.531535  | 0.352419  |               |  |  |  |
| H                  | 3.133777  | -0.643752 | -0.286999 | H                  | -4.587459 | -0.825949 | -0.270537 |               |  |  |  |
| H                  | 3.156670  | -2.456779 | 0.259768  | H                  | -3.239854 | -0.373686 | -1.502583 |               |  |  |  |
| H                  | 1.072165  | -2.155369 | 1.018774  | H                  | -3.755554 | 0.836565  | 0.993063  |               |  |  |  |
| N                  | -1.311372 | 1.733810  | -0.650589 | N                  | 2.086756  | -0.296139 | -1.563296 |               |  |  |  |
| H                  | -2.032891 | 1.318435  | -1.241902 | H                  | 1.703076  | 0.341128  | -2.263594 |               |  |  |  |
| H                  | -0.884946 | 2.469567  | -1.213254 | H                  | 2.228026  | -1.186771 | -2.041263 |               |  |  |  |
| H                  | -1.811065 | 2.219428  | 0.094150  | H                  | 3.022561  | 0.047382  | -1.349404 |               |  |  |  |
| N                  | 0.730611  | 0.001386  | -2.029826 | N                  | -0.515964 | -1.753639 | -1.004692 |               |  |  |  |
| H                  | 1.436029  | -0.735816 | -2.097473 | H                  | -1.481176 | -1.748446 | -0.661372 |               |  |  |  |
| H                  | 1.153946  | 0.824613  | -2.457626 | H                  | -0.210607 | -2.727120 | -0.983619 |               |  |  |  |
| H                  | -0.022672 | -0.272588 | -2.661385 | H                  | -0.586266 | -1.503553 | -1.990924 |               |  |  |  |
| N                  | -0.648859 | 0.361442  | 2.035861  | N                  | 2.047029  | 0.819447  | 1.293564  |               |  |  |  |
| H                  | -0.839716 | 1.307203  | 2.366537  | H                  | 2.451984  | 0.336172  | 2.096055  |               |  |  |  |
| H                  | 0.044748  | -0.013152 | 2.683706  | H                  | 1.546685  | 1.626122  | 1.668082  |               |  |  |  |
| H                  | -1.503273 | -0.164204 | 2.218281  | H                  | 2.842241  | 1.206862  | 0.786605  |               |  |  |  |
| N                  | 1.583672  | 1.602791  | 0.486152  | N                  | -0.486986 | -0.803892 | 1.828925  |               |  |  |  |
| H                  | 1.257765  | 2.455531  | 0.940743  | H                  | -0.580670 | -1.798040 | 2.037796  |               |  |  |  |
| H                  | 2.139642  | 1.920392  | -0.307824 | H                  | -1.425650 | -0.459430 | 1.608117  |               |  |  |  |
| H                  | 2.250946  | 1.184905  | 1.136626  | H                  | -0.212005 | -0.359498 | 2.703794  |               |  |  |  |
| O                  | -1.525652 | -1.163914 | -0.559998 | O                  | -0.532411 | 1.392901  | -0.444420 |               |  |  |  |
| C                  | -2.795996 | -1.305342 | 0.105367  | C                  | -0.117031 | 2.753188  | -0.641585 |               |  |  |  |
| H                  | -1.276839 | -2.000119 | -0.972150 | H                  | -1.491586 | 1.334743  | -0.279715 |               |  |  |  |
| H                  | -3.127564 | -0.307009 | 0.381282  | H                  | 0.956658  | 2.742328  | -0.821000 |               |  |  |  |

|                       |           |           |           |                    |           |           |           |               |
|-----------------------|-----------|-----------|-----------|--------------------|-----------|-----------|-----------|---------------|
| H                     | -2.702360 | -1.927096 | 0.994819  | H                  | -0.331205 | 3.358800  | 0.237511  |               |
| H                     | -3.522700 | -1.744203 | -0.573025 | H                  | -0.613202 | 3.181709  | -1.509096 |               |
| <b>Structure (9)</b>  |           |           |           |                    |           |           |           |               |
| E = -550.750952618    |           |           |           | E = -550.663963547 |           |           |           | Not available |
| Ru                    | 0.068296  | 0.220597  | 0.011388  | Ru                 | 0.842531  | -0.400766 | 0.078788  |               |
| C                     | 2.344318  | -1.660434 | 0.047045  | C                  | -4.295624 | -0.027973 | -0.071145 |               |
| O                     | 0.957255  | -1.436462 | 0.157845  | O                  | -2.933336 | -0.097471 | 0.001059  |               |
| H                     | 2.820191  | -0.966814 | -0.657298 | H                  | -4.774466 | -1.008161 | -0.049881 |               |
| H                     | 2.517620  | -2.678741 | -0.296642 | H                  | -4.639242 | 0.610713  | -0.889035 |               |
| H                     | 2.832387  | -1.552349 | 1.020849  | H                  | -4.611527 | 0.495199  | 0.857105  |               |
| N                     | -1.175814 | 2.010095  | -0.246914 | N                  | 2.168311  | -0.116996 | -1.588820 |               |
| H                     | -1.880939 | 1.853555  | -0.968365 | H                  | 1.778857  | 0.581374  | -2.224499 |               |
| H                     | -0.683600 | 2.859443  | -0.523666 | H                  | 2.303422  | -0.961606 | -2.145089 |               |
| H                     | -1.702434 | 2.262829  | 0.589606  | H                  | 3.105960  | 0.205338  | -1.351633 |               |
| N                     | 0.546176  | 0.275843  | -2.064449 | N                  | -0.420555 | -1.642034 | -1.135871 |               |
| H                     | 1.329072  | -0.352888 | -2.251575 | H                  | -1.376473 | -1.648248 | -0.776289 |               |
| H                     | 0.788596  | 1.172538  | -2.484700 | H                  | -0.123457 | -2.616174 | -1.189539 |               |
| H                     | -0.240256 | -0.095498 | -2.600603 | H                  | -0.498037 | -1.316226 | -2.098955 |               |
| N                     | -0.488502 | 0.018264  | 2.065930  | N                  | 2.105821  | 0.802506  | 1.338764  |               |
| H                     | -0.091894 | 0.672262  | 2.740330  | H                  | 2.571804  | 0.259770  | 2.066564  |               |
| H                     | -0.154297 | -0.909683 | 2.333945  | H                  | 1.581690  | 1.533257  | 1.820555  |               |
| H                     | -1.495524 | 0.017937  | 2.227998  | H                  | 2.854197  | 1.289886  | 0.847018  |               |
| N                     | 1.777472  | 1.366259  | 0.521635  | N                  | -0.346756 | -0.972310 | 1.775019  |               |
| H                     | 1.598318  | 2.206199  | 1.072807  | H                  | -0.209445 | -1.952585 | 2.023502  |               |
| H                     | 2.318535  | 1.676963  | -0.285666 | H                  | -1.335301 | -0.868641 | 1.532921  |               |
| H                     | 2.421262  | 0.798334  | 1.075229  | H                  | -0.200871 | -0.442699 | 2.633239  |               |
| O                     | -1.499323 | -1.083896 | -0.551362 | O                  | -0.551332 | 1.349733  | -0.410928 |               |
| C                     | -2.847223 | -1.140251 | -0.041152 | C                  | -0.344697 | 2.769617  | -0.350109 |               |
| H                     | -1.085557 | -1.964278 | -0.542712 | H                  | -1.499365 | 1.122221  | -0.420809 |               |
| H                     | -3.226857 | -0.122331 | -0.010774 | H                  | 0.728816  | 2.943472  | -0.380479 |               |
| H                     | -2.867964 | -1.580584 | 0.954432  | H                  | -0.754504 | 3.183648  | 0.569339  |               |
| H                     | -3.463053 | -1.729408 | -0.714903 | H                  | -0.801893 | 3.257056  | -1.207864 |               |
| <b>Structure (10)</b> |           |           |           |                    |           |           |           |               |
| E = -550.725896404    |           |           |           | Not available      |           |           |           | Not available |
| Ru                    | -0.218933 | -0.224595 | -0.006318 |                    |           |           |           |               |
| H                     | 2.258394  | 1.916198  | 1.322110  |                    |           |           |           |               |
| O                     | -1.505565 | 1.146720  | -0.157155 |                    |           |           |           |               |
| C                     | 1.987389  | 0.938739  | 0.920420  |                    |           |           |           |               |
| C                     | -1.245648 | 2.516621  | 0.073533  |                    |           |           |           |               |
| O                     | 2.786379  | 0.545586  | -0.160252 |                    |           |           |           |               |
| H                     | 0.939738  | 1.168630  | 0.552382  |                    |           |           |           |               |
| H                     | 1.989386  | 0.212944  | 1.734393  |                    |           |           |           |               |
| H                     | -0.432537 | 2.874056  | -0.568079 |                    |           |           |           |               |
| H                     | -0.964927 | 2.690953  | 1.116741  |                    |           |           |           |               |
| H                     | -2.143109 | 3.090007  | -0.147692 |                    |           |           |           |               |
| N                     | -1.805931 | -1.313617 | -0.784967 |                    |           |           |           |               |
| H                     | -1.660463 | -1.712003 | -1.712366 |                    |           |           |           |               |
| H                     | -2.548700 | -0.611278 | -0.872052 |                    |           |           |           |               |
| H                     | -2.165506 | -2.071144 | -0.204726 |                    |           |           |           |               |
| N                     | 0.527150  | 0.222941  | -1.939982 |                    |           |           |           |               |
| H                     | 0.484673  | -0.514353 | -2.642959 |                    |           |           |           |               |
| H                     | 1.510266  | 0.499001  | -1.855297 |                    |           |           |           |               |
| H                     | 0.016617  | 1.017748  | -2.327955 |                    |           |           |           |               |
| N                     | -0.929670 | -0.626923 | 1.978592  |                    |           |           |           |               |
| H                     | -1.189962 | -1.592172 | 2.181331  |                    |           |           |           |               |
| H                     | -1.775852 | -0.067730 | 2.103433  |                    |           |           |           |               |
| H                     | -0.295902 | -0.345272 | 2.727018  |                    |           |           |           |               |

|                       |           |           |               |  |               |
|-----------------------|-----------|-----------|---------------|--|---------------|
| N                     | 1.186633  | -1.897978 | 0.071980      |  |               |
| H                     | 2.117311  | -1.546165 | -0.169838     |  |               |
| H                     | 0.988253  | -2.670095 | -0.563146     |  |               |
| H                     | 1.281000  | -2.325948 | 0.993101      |  |               |
| H                     | 3.680139  | 0.907266  | -0.092206     |  |               |
| <b>Structure (11)</b> |           |           |               |  |               |
| E = -550.736006189    |           |           | Not available |  | Not available |
| Ru                    | -0.027115 | 0.170463  | 0.021971      |  |               |
| H                     | -0.745828 | -2.297229 | 0.214050      |  |               |
| O                     | 1.523716  | -1.012777 | -0.722017     |  |               |
| C                     | -1.258346 | -1.381294 | 0.538581      |  |               |
| C                     | 2.836072  | -1.222377 | -0.144583     |  |               |
| O                     | -2.503559 | -1.223200 | -0.115450     |  |               |
| H                     | 1.308351  | -1.725462 | -1.338996     |  |               |
| H                     | -1.400372 | -1.442842 | 1.623622      |  |               |
| H                     | 2.808143  | -2.043037 | 0.569064      |  |               |
| H                     | 3.118247  | -0.295127 | 0.346417      |  |               |
| H                     | 3.546000  | -1.441186 | -0.936931     |  |               |
| N                     | 1.230079  | 2.046627  | -0.490260     |  |               |
| H                     | 0.745421  | 2.750562  | -1.045466     |  |               |
| H                     | 2.025459  | 1.759899  | -1.061363     |  |               |
| H                     | 1.625788  | 2.553925  | 0.299835      |  |               |
| N                     | -0.926245 | 0.149778  | -1.913712     |  |               |
| H                     | -1.258634 | 1.050808  | -2.255329     |  |               |
| H                     | -1.749060 | -0.456614 | -1.829981     |  |               |
| H                     | -0.344590 | -0.221050 | -2.664587     |  |               |
| N                     | 0.802281  | 0.069456  | 2.005559      |  |               |
| H                     | 1.476797  | 0.797752  | 2.238658      |  |               |
| H                     | 1.281416  | -0.818427 | 2.158669      |  |               |
| H                     | 0.087545  | 0.108799  | 2.732886      |  |               |
| N                     | -1.660249 | 1.324567  | 0.671381      |  |               |
| H                     | -2.490486 | 0.745490  | 0.491888      |  |               |
| H                     | -1.782925 | 2.195908  | 0.155695      |  |               |
| H                     | -1.677336 | 1.581789  | 1.657832      |  |               |
| H                     | -3.129537 | -1.927489 | 0.102274      |  |               |
| <b>Structure (12)</b> |           |           |               |  |               |
| E = -435.057043745    |           |           |               |  |               |
| Ru                    | -0.071591 | 0.008709  | 0.071109      |  |               |
| C                     | 1.692937  | -0.583935 | 0.844697      |  |               |
| O                     | 1.863323  | -0.414228 | -0.551697     |  |               |
| H                     | 2.125013  | -1.219610 | -1.024326     |  |               |
| N                     | 0.682603  | 2.005099  | 0.215017      |  |               |
| H                     | 0.810795  | 2.326287  | 1.175004      |  |               |
| H                     | 0.141618  | 2.732330  | -0.252531     |  |               |
| H                     | 1.611123  | 2.034944  | -0.212479     |  |               |
| N                     | -1.774003 | 0.475038  | 1.253870      |  |               |
| H                     | -2.064583 | 1.452216  | 1.208361      |  |               |
| H                     | -1.557021 | 0.300857  | 2.237825      |  |               |
| H                     | -2.609891 | -0.075692 | 1.055142      |  |               |
| N                     | -0.703464 | -2.050325 | 0.002850      |  |               |
| H                     | -0.705575 | -2.477631 | 0.929953      |  |               |
| H                     | -0.099936 | -2.646904 | -0.564405     |  |               |
| H                     | -1.641455 | -2.197505 | -0.370871     |  |               |
| N                     | -0.906935 | 0.441047  | -1.974203     |  |               |
| H                     | -1.581769 | 1.205511  | -1.996618     |  |               |
| H                     | -1.365365 | -0.343818 | -2.435181     |  |               |
| H                     | -0.152835 | 0.724381  | -2.600331     |  |               |

|                       |           |           |           |  |  |
|-----------------------|-----------|-----------|-----------|--|--|
| H                     | 2.280400  | 0.134238  | 1.407449  |  |  |
| H                     | 1.807870  | -1.611369 | 1.176876  |  |  |
| <b>Structure (13)</b> |           |           |           |  |  |
| E = -435.023190967    |           |           |           |  |  |
| Ru                    | -0.082915 | -0.000174 | -0.199988 |  |  |
| C                     | 1.973024  | 0.001417  | 0.534878  |  |  |
| O                     | 1.833482  | 0.000784  | -0.734409 |  |  |
| H                     | -0.109510 | -0.001119 | -1.755936 |  |  |
| N                     | 0.011522  | 2.120577  | -0.348254 |  |  |
| H                     | 0.009981  | 2.656875  | 0.519828  |  |  |
| H                     | -0.701589 | 2.533058  | -0.950554 |  |  |
| H                     | 0.900596  | 2.319852  | -0.815820 |  |  |
| N                     | -0.436503 | 0.001170  | 2.123208  |  |  |
| H                     | -0.028367 | 0.809862  | 2.591707  |  |  |
| H                     | -0.026578 | -0.805912 | 2.592922  |  |  |
| H                     | -1.418134 | 0.000262  | 2.399692  |  |  |
| N                     | 0.014648  | -2.120935 | -0.346425 |  |  |
| H                     | 0.903887  | -2.319188 | -0.814108 |  |  |
| H                     | -0.697997 | -2.535065 | -0.948144 |  |  |
| H                     | 0.014217  | -2.656480 | 0.522125  |  |  |
| N                     | -2.204926 | -0.001746 | -0.383050 |  |  |
| H                     | -2.660679 | 0.811687  | 0.034266  |  |  |
| H                     | -2.659255 | -0.816487 | 0.033270  |  |  |
| H                     | -2.471121 | -0.001408 | -1.369072 |  |  |
| H                     | 2.196365  | 0.936260  | 1.053074  |  |  |
| H                     | 2.197248  | -0.932766 | 1.053886  |  |  |
| <b>Structure (14)</b> |           |           |           |  |  |
| E = -435.044152159    |           |           |           |  |  |
| Ru                    | 0.044864  | 0.000004  | -0.145729 |  |  |
| O                     | -1.715735 | 0.000235  | 0.665499  |  |  |
| C                     | -2.034077 | 0.000369  | -0.598059 |  |  |
| H                     | -2.380873 | -0.925635 | -1.053369 |  |  |
| H                     | -0.302439 | 0.000168  | -1.687150 |  |  |
| H                     | -2.380607 | 0.926531  | -1.053251 |  |  |
| N                     | -0.000333 | -2.127996 | -0.189882 |  |  |
| H                     | 0.801056  | -2.605600 | 0.223702  |  |  |
| H                     | -0.116914 | -2.511533 | -1.128642 |  |  |
| H                     | -0.814720 | -2.436076 | 0.347857  |  |  |
| N                     | 0.733320  | -0.000285 | 2.008856  |  |  |
| H                     | 1.262167  | -0.811388 | 2.327897  |  |  |
| H                     | -0.129456 | -0.000136 | 2.556806  |  |  |
| H                     | 1.262393  | 0.810696  | 2.327837  |  |  |
| N                     | 0.000460  | 2.128035  | -0.189674 |  |  |
| H                     | -0.813831 | 2.436361  | 0.348076  |  |  |
| H                     | -0.116060 | 2.511597  | -1.128430 |  |  |
| H                     | 0.801979  | 2.605427  | 0.223891  |  |  |
| N                     | 2.064361  | -0.000284 | -0.858371 |  |  |
| H                     | 2.771156  | -0.000691 | -0.122379 |  |  |
| H                     | 2.264099  | 0.806866  | -1.451196 |  |  |
| H                     | 2.263699  | -0.807156 | -1.451710 |  |  |
| <b>Structure (15)</b> |           |           |           |  |  |
| E = -435.048083096    |           |           |           |  |  |
| Ru                    | 0.175054  | -0.000001 | -0.148941 |  |  |
| O                     | -1.812631 | -0.000662 | 0.206491  |  |  |
| C                     | -2.876923 | -0.000365 | -0.405778 |  |  |
| H                     | -3.810585 | -0.001092 | 0.158591  |  |  |

|                                     |           |           |                    |    |               |           |           |  |  |
|-------------------------------------|-----------|-----------|--------------------|----|---------------|-----------|-----------|--|--|
| H                                   | -0.140744 | -0.000351 | -1.703991          |    |               |           |           |  |  |
| H                                   | -2.895600 | 0.000660  | -1.497717          |    |               |           |           |  |  |
| N                                   | 0.138340  | -2.142420 | -0.201816          |    |               |           |           |  |  |
| H                                   | 0.936944  | -2.608182 | 0.228577           |    |               |           |           |  |  |
| H                                   | 0.087563  | -2.490386 | -1.158845          |    |               |           |           |  |  |
| H                                   | -0.683369 | -2.517376 | 0.272637           |    |               |           |           |  |  |
| N                                   | 0.522158  | 0.000312  | 2.129450           |    |               |           |           |  |  |
| H                                   | 1.004147  | -0.810961 | 2.514398           |    |               |           |           |  |  |
| H                                   | -0.400560 | -0.000700 | 2.566230           |    |               |           |           |  |  |
| H                                   | 1.002518  | 0.812399  | 2.514713           |    |               |           |           |  |  |
| N                                   | 0.136945  | 2.142378  | -0.201875          |    |               |           |           |  |  |
| H                                   | 0.933868  | 2.608791  | 0.230923           |    |               |           |           |  |  |
| H                                   | -0.686485 | 2.516571  | 0.270195           |    |               |           |           |  |  |
| H                                   | 0.088633  | 2.490449  | -1.158998          |    |               |           |           |  |  |
| N                                   | 2.191420  | 0.000556  | -0.761589          |    |               |           |           |  |  |
| H                                   | 2.851316  | 0.000345  | 0.018402           |    |               |           |           |  |  |
| H                                   | 2.425204  | 0.812538  | -1.333765          |    |               |           |           |  |  |
| H                                   | 2.425318  | -0.810936 | -1.334407          |    |               |           |           |  |  |
| <b>Structure (16)</b>               |           |           |                    |    |               |           |           |  |  |
| E = -320.550373933                  |           |           |                    |    |               |           |           |  |  |
| Ru                                  | 0.000071  | -0.061929 | -0.244647          |    |               |           |           |  |  |
| H                                   | -0.000876 | -1.476071 | -0.930852          |    |               |           |           |  |  |
| N                                   | -2.099733 | -0.237018 | -0.519826          |    |               |           |           |  |  |
| H                                   | -2.653064 | 0.499989  | -0.077815          |    |               |           |           |  |  |
| H                                   | -2.495307 | -1.124593 | -0.207855          |    |               |           |           |  |  |
| H                                   | -2.319363 | -0.183893 | -1.518388          |    |               |           |           |  |  |
| N                                   | 0.003107  | 2.071793  | 0.641357           |    |               |           |           |  |  |
| H                                   | -0.805952 | 2.285681  | 1.225345           |    |               |           |           |  |  |
| H                                   | 0.008145  | 2.793638  | -0.081295          |    |               |           |           |  |  |
| H                                   | 0.808198  | 2.281300  | 1.232358           |    |               |           |           |  |  |
| N                                   | 2.099550  | -0.241894 | -0.518732          |    |               |           |           |  |  |
| H                                   | 2.321791  | -0.178737 | -1.516113          |    |               |           |           |  |  |
| H                                   | 2.490413  | -1.134578 | -0.215514          |    |               |           |           |  |  |
| H                                   | 2.655023  | 0.487759  | -0.067295          |    |               |           |           |  |  |
| N                                   | -0.003091 | -1.202596 | 1.472716           |    |               |           |           |  |  |
| H                                   | 0.812825  | -1.032023 | 2.063742           |    |               |           |           |  |  |
| H                                   | -0.008228 | -2.201881 | 1.263439           |    |               |           |           |  |  |
| H                                   | -0.815540 | -1.023736 | 2.066128           |    |               |           |           |  |  |
| <b>Structure (TS<sub>2-3</sub>)</b> |           |           |                    |    |               |           |           |  |  |
| E = -475.497531446                  |           |           | E = -475.424535985 |    | Not available |           |           |  |  |
| Ru                                  | 0.227744  | -0.011677 | -0.009835          | Ru | 0.227994      | 0.029579  | -0.040087 |  |  |
| H                                   | -1.017014 | 2.505643  | 1.166398           | H  | -0.631841     | -0.498235 | -2.926483 |  |  |
| O                                   | -1.584538 | 0.472505  | -0.575654          | O  | -1.415243     | -0.957802 | -0.362626 |  |  |
| C                                   | -0.162662 | 1.807211  | 1.194805           | C  | 0.093831      | -0.034125 | -2.235420 |  |  |
| C                                   | -2.800539 | -0.189601 | -0.231535          | C  | -2.710420     | -0.820012 | 0.218828  |  |  |
| H                                   | 0.689297  | 2.437961  | 0.951502           | H  | 1.027000      | -0.560857 | -2.437542 |  |  |
| H                                   | -1.064443 | 1.273047  | 0.291446           | H  | -0.914028     | -0.528256 | -1.471932 |  |  |
| H                                   | -0.119390 | 1.478068  | 2.230964           | H  | 0.156130      | 1.008593  | -2.540948 |  |  |
| H                                   | -3.147068 | 0.126968  | 0.755249           | H  | -3.311173     | -0.126673 | -0.369509 |  |  |
| H                                   | -2.672019 | -1.273257 | -0.251966          | H  | -2.631907     | -0.465037 | 1.247915  |  |  |
| H                                   | -3.555186 | 0.094219  | -0.961001          | H  | -3.191780     | -1.795377 | 0.208040  |  |  |
| N                                   | 0.507996  | -1.790029 | -1.257043          | N  | 0.172782      | 0.070111  | 2.177800  |  |  |
| H                                   | 1.343162  | -1.795351 | -1.843183          | H  | 1.071414      | 0.141830  | 2.654559  |  |  |
| H                                   | -0.281443 | -1.832629 | -1.904920          | H  | -0.271448     | -0.778396 | 2.531185  |  |  |
| H                                   | 0.513585  | -2.684873 | -0.768106          | H  | -0.392453     | 0.846546  | 2.521910  |  |  |
| N                                   | 0.804687  | 1.267750  | -1.612678          | N  | 1.485101      | -2.075745 | 0.219878  |  |  |
| H                                   | 1.452681  | 0.905993  | -2.312037          | H  | 2.070810      | -2.246363 | 1.035900  |  |  |



|                                     |           |           |           |                    |           |           |           |               |
|-------------------------------------|-----------|-----------|-----------|--------------------|-----------|-----------|-----------|---------------|
| H                                   | 1.190315  | 2.159423  | -1.301085 | H                  | 2.069507  | -2.273715 | -0.591607 |               |
| H                                   | -0.059898 | 1.493656  | -2.111340 | H                  | 0.765992  | -2.798933 | 0.224799  |               |
| N                                   | -0.496072 | -1.206183 | 1.615442  | N                  | -1.107363 | 2.176423  | 0.108806  |               |
| H                                   | -0.568377 | -2.206153 | 1.427352  | H                  | -0.737830 | 2.967610  | 0.634042  |               |
| H                                   | -1.437204 | -0.909173 | 1.878813  | H                  | -2.038614 | 1.998037  | 0.483499  |               |
| H                                   | 0.059820  | -1.120159 | 2.467395  | H                  | -1.255988 | 2.520641  | -0.839319 |               |
| N                                   | 2.228786  | -0.153673 | 0.785250  | N                  | 2.034322  | 1.226255  | -0.105680 |               |
| H                                   | 2.323871  | 0.482152  | 1.579845  | H                  | 2.145416  | 1.680018  | -1.013625 |               |
| H                                   | 2.949002  | 0.140029  | 0.124494  | H                  | 2.868505  | 0.649413  | 0.014349  |               |
| H                                   | 2.517286  | -1.072541 | 1.121747  | H                  | 2.098108  | 1.965635  | 0.593511  |               |
| <b>Structure (TS<sub>4-5</sub>)</b> |           |           |           |                    |           |           |           |               |
| E = -585.194132937                  |           |           |           | E = -585.175278882 |           |           |           | Not available |
| Ru                                  | 0.291790  | 0.057970  | -0.060058 | Ru                 | 0.348441  | -0.016925 | -0.021638 |               |
| O                                   | -1.106369 | 1.090279  | -0.452654 | O                  | -1.101772 | -0.030617 | -1.165340 |               |
| O                                   | -2.837383 | -0.188165 | 0.449799  | O                  | -2.859990 | 0.272114  | 0.260945  |               |
| O                                   | -2.586614 | 0.450291  | -0.557510 | O                  | -2.486372 | -0.459826 | -0.647290 |               |
| C                                   | 1.310680  | -0.302323 | -1.784308 | C                  | 1.172912  | -1.814305 | -0.623182 |               |
| H                                   | 1.337553  | -1.339110 | -2.109500 | H                  | 1.468406  | -2.415288 | 0.236080  |               |
| H                                   | 2.295253  | 0.155657  | -1.836609 | H                  | 2.035536  | -1.638523 | -1.264788 |               |
| H                                   | 0.599659  | 0.260698  | -2.407676 | H                  | 0.401301  | -2.337442 | -1.187501 |               |
| N                                   | 2.184631  | -0.963797 | 0.599260  | N                  | 2.179456  | 0.148799  | 1.150709  |               |
| H                                   | 2.339846  | -1.846892 | 0.111761  | H                  | 2.038430  | 0.072339  | 2.159684  |               |
| H                                   | 2.285575  | -1.177982 | 1.591511  | H                  | 2.668344  | 1.035864  | 1.018139  |               |
| H                                   | 2.995406  | -0.392327 | 0.359879  | H                  | 2.847149  | -0.583908 | 0.903959  |               |
| N                                   | -0.693168 | -1.797882 | -0.467456 | N                  | -0.642861 | -1.186569 | 1.457017  |               |
| H                                   | -1.235761 | -1.699998 | -1.328996 | H                  | -1.159580 | -1.925949 | 0.972005  |               |
| H                                   | -1.367317 | -2.094141 | 0.239686  | H                  | -1.336105 | -0.681898 | 2.012162  |               |
| H                                   | -0.067983 | -2.588287 | -0.627464 | H                  | -0.023163 | -1.673421 | 2.106385  |               |
| N                                   | 1.249849  | 1.962476  | 0.157917  | N                  | 1.278222  | 0.945772  | -1.681290 |               |
| H                                   | 0.525621  | 2.683716  | 0.109315  | H                  | 0.873501  | 0.511112  | -2.515800 |               |
| H                                   | 1.886263  | 2.158195  | -0.616859 | H                  | 2.289622  | 0.839513  | -1.766276 |               |
| H                                   | 1.778482  | 2.142108  | 1.011302  | H                  | 1.066878  | 1.941364  | -1.765113 |               |
| N                                   | -0.066291 | -0.213426 | 2.020840  | N                  | -0.316283 | 1.986742  | 0.930582  |               |
| H                                   | -1.019094 | 0.138949  | 2.159138  | H                  | -1.186711 | 2.220455  | 0.449469  |               |
| H                                   | 0.534271  | 0.312826  | 2.656502  | H                  | 0.296932  | 2.794938  | 0.825112  |               |
| H                                   | -0.072862 | -1.180992 | 2.345423  | H                  | -0.554063 | 1.954806  | 1.921993  |               |
| <b>Structure (TS<sub>5-1</sub>)</b> |           |           |           |                    |           |           |           |               |
| E = -434.972764143                  |           |           |           | E = -434.947149705 |           |           |           | Not available |
| Ru                                  | 0.014709  | 0.000008  | -0.123584 | Ru                 | 0.008875  | -0.000008 | 0.057385  |               |
| O                                   | -1.391684 | 0.000036  | -1.094071 | O                  | -1.328088 | 0.002148  | -1.122300 |               |
| C                                   | -2.201710 | -0.000035 | 0.726275  | C                  | -2.226745 | 0.004989  | 0.579243  |               |
| H                                   | -2.735863 | 0.905224  | 0.476693  | H                  | -2.753129 | 0.914576  | 0.328601  |               |
| H                                   | -1.788763 | 0.000296  | 1.731214  | H                  | -1.818334 | 0.003948  | 1.596348  |               |
| H                                   | -2.735451 | -0.905642 | 0.477074  | H                  | -2.757667 | -0.901998 | 0.328731  |               |
| N                                   | 1.077408  | -0.000047 | 1.828310  | N                  | 1.563963  | -0.001333 | 1.648759  |               |
| H                                   | 1.672254  | -0.812369 | 1.998096  | H                  | 2.514534  | 0.011710  | 1.275986  |               |
| H                                   | 0.401281  | 0.000036  | 2.593234  | H                  | 1.523032  | -0.817636 | 2.260544  |               |
| H                                   | 1.672428  | 0.812153  | 1.998072  | H                  | 1.506872  | 0.801959  | 2.276320  |               |
| N                                   | -0.070929 | 2.150747  | -0.158483 | N                  | -0.035249 | 2.147194  | 0.079836  |               |
| H                                   | -0.762457 | 2.392603  | -0.871719 | H                  | -0.588329 | 2.451500  | -0.723881 |               |
| H                                   | 0.779023  | 2.650255  | -0.420199 | H                  | 0.869077  | 2.611605  | -0.004992 |               |
| H                                   | -0.398496 | 2.576727  | 0.708874  | H                  | -0.486866 | 2.551985  | 0.901079  |               |
| N                                   | -0.070938 | -2.150728 | -0.158547 | N                  | -0.045061 | -2.146944 | 0.083216  |               |
| H                                   | -0.762939 | -2.392500 | -0.871354 | H                  | -0.600128 | -2.450037 | -0.719590 |               |
| H                                   | -0.397918 | -2.576811 | 0.708981  | H                  | -0.497837 | -2.548419 | 0.905453  |               |
| H                                   | 0.778835  | -2.650203 | -0.420911 | H                  | 0.857101  | -2.615533 | -0.001727 |               |
| N                                   | 2.034959  | -0.000001 | -0.833811 | N                  | 1.483566  | -0.005014 | -1.712232 |               |

|                                     |           |           |           |                    |           |           |           |                    |           |           |           |
|-------------------------------------|-----------|-----------|-----------|--------------------|-----------|-----------|-----------|--------------------|-----------|-----------|-----------|
| H                                   | 1.984824  | -0.000232 | -1.854923 | H                  | 0.878002  | -0.008446 | -2.534884 |                    |           |           |           |
| H                                   | 2.598213  | -0.813380 | -0.581203 | H                  | 2.089849  | -0.819675 | -1.800657 |                    |           |           |           |
| H                                   | 2.598056  | 0.813600  | -0.581575 | H                  | 2.087962  | 0.810401  | -1.806380 |                    |           |           |           |
| <b>Structure (TS<sub>2-6</sub>)</b> |           |           |           |                    |           |           |           |                    |           |           |           |
| E = -475.463449442                  |           |           |           | E = -475.442355738 |           |           |           | E = -475.383771797 |           |           |           |
| Ru                                  | -0.515212 | -0.007142 | -0.157375 | Ru                 | -0.528882 | 0.039316  | -0.115830 | Ru                 | -0.591163 | 0.069070  | -0.020333 |
| H                                   | 2.971493  | -1.630711 | 1.181354  | H                  | 2.749953  | -1.903690 | 0.700351  | H                  | 2.978972  | 2.036467  | 0.804668  |
| O                                   | 1.365060  | 0.753763  | 0.059207  | O                  | 1.376618  | 0.754471  | 0.099116  | O                  | 1.555030  | -0.501783 | -0.180030 |
| C                                   | 3.326149  | -0.808718 | 0.567227  | C                  | 3.215075  | -0.924111 | 0.646429  | C                  | 3.376373  | 1.245998  | 0.176272  |
| C                                   | 1.894300  | 1.516186  | -1.036133 | C                  | 1.986474  | 1.484739  | -0.973641 | C                  | 2.303082  | -1.698043 | 0.018813  |
| H                                   | 3.964898  | -0.105239 | 1.090051  | H                  | 3.629285  | -0.566462 | 1.582760  | H                  | 3.671240  | 1.561075  | -0.819186 |
| H                                   | 2.239593  | -0.020944 | 0.342848  | H                  | 2.221388  | -0.071419 | 0.434627  | H                  | 2.409771  | 0.443483  | -0.015777 |
| H                                   | 3.683407  | -1.089424 | -0.417850 | H                  | 3.862429  | -0.779474 | -0.211970 | H                  | 4.115459  | 0.625559  | 0.672650  |
| H                                   | 2.920935  | 1.803989  | -0.818733 | H                  | 2.976779  | 1.817599  | -0.670775 | H                  | 3.144812  | -1.744622 | -0.669577 |
| H                                   | 1.292719  | 2.419847  | -1.131713 | H                  | 1.362847  | 2.357021  | -1.168465 | H                  | 1.629404  | -2.532444 | -0.189284 |
| H                                   | 1.858439  | 0.948219  | -1.966914 | H                  | 2.056511  | 0.882072  | -1.880422 | H                  | 2.658432  | -1.781181 | 1.046041  |
| N                                   | 0.268128  | -1.871873 | -0.870484 | N                  | 0.113794  | -1.305452 | -1.671703 | N                  | -0.395544 | -0.544257 | 2.208021  |
| H                                   | -0.118341 | -2.718568 | -0.452514 | H                  | -0.367333 | -2.202986 | -1.729655 | H                  | -0.693972 | 0.165424  | 2.876352  |
| H                                   | 1.276431  | -1.918048 | -0.708630 | H                  | 1.109625  | -1.516223 | -1.587273 | H                  | 0.588442  | -0.725686 | 2.402443  |
| H                                   | 0.149528  | -1.994553 | -1.877446 | H                  | -0.001861 | -0.868358 | -2.587811 | H                  | -0.898913 | -1.396217 | 2.452894  |
| N                                   | -0.304073 | -0.568643 | 1.820171  | N                  | -0.120610 | -1.219174 | 1.844893  | N                  | 0.083465  | 2.106521  | -0.797188 |
| H                                   | -1.084670 | -0.304146 | 2.421647  | H                  | -0.892843 | -1.243866 | 2.508792  | H                  | -0.564021 | 2.559925  | -1.440775 |
| H                                   | 0.524032  | -0.106396 | 2.204005  | H                  | 0.674763  | -0.823688 | 2.345199  | H                  | 0.971845  | 2.020448  | -1.290904 |
| H                                   | -0.169307 | -1.569488 | 1.966223  | H                  | 0.115884  | -2.193856 | 1.664505  | H                  | 0.238552  | 2.770057  | -0.038812 |
| N                                   | -1.188126 | 1.936896  | 0.469057  | N                  | -1.119323 | 1.846292  | 0.897139  | N                  | -0.853310 | -1.477995 | -1.709402 |
| H                                   | -1.507024 | 2.523841  | -0.303228 | H                  | -1.512132 | 2.536816  | 0.255609  | H                  | -1.084194 | -2.404439 | -1.352370 |
| H                                   | -0.408841 | 2.441691  | 0.894076  | H                  | -0.292275 | 2.278756  | 1.311201  | H                  | 0.025305  | -1.575107 | -2.217468 |
| H                                   | -1.944284 | 1.965115  | 1.153064  | H                  | -1.802454 | 1.742474  | 1.647265  | H                  | -1.566817 | -1.256542 | -2.402755 |
| N                                   | -2.549933 | -0.670842 | -0.407101 | N                  | -2.580460 | -0.549500 | -0.368654 | N                  | -2.880788 | 0.413700  | 0.329167  |
| H                                   | -3.219832 | -0.221094 | 0.216561  | H                  | -3.221347 | -0.112241 | 0.292993  | H                  | -3.343394 | 0.737135  | -0.519774 |
| H                                   | -2.680548 | -1.671753 | -0.261604 | H                  | -2.728572 | -1.552636 | -0.259564 | H                  | -3.078350 | 1.121818  | 1.034729  |
| H                                   | -2.904447 | -0.491783 | -1.348422 | H                  | -2.945869 | -0.314422 | -1.292213 | H                  | -3.385116 | -0.423498 | 0.617117  |
| <b>Structure (TS<sub>7-8</sub>)</b> |           |           |           |                    |           |           |           |                    |           |           |           |
| E = -550.686947568                  |           |           |           | E = -550.640843071 |           |           |           | Not available      |           |           |           |
| H                                   | 2.082038  | -0.256771 | -0.530185 | H                  | -2.101637 | 0.521309  | 0.469432  |                    |           |           |           |
| Ru                                  | -0.368776 | -0.033174 | 0.004053  | Ru                 | 0.570045  | -0.182921 | 0.064994  |                    |           |           |           |
| O                                   | 1.420790  | 0.696338  | -0.643156 | O                  | -0.948303 | 1.124978  | 0.445003  |                    |           |           |           |
| C                                   | 2.182941  | -1.557907 | 0.035670  | C                  | -3.180138 | -0.137208 | 0.241525  |                    |           |           |           |
| C                                   | 2.156554  | 1.764080  | -0.032462 | C                  | -1.194205 | 2.266884  | -0.368845 |                    |           |           |           |
| O                                   | 0.797833  | -1.792476 | -0.068275 | O                  | -2.796755 | -1.444330 | 0.093795  |                    |           |           |           |
| H                                   | 2.471314  | -1.338577 | 1.059357  | H                  | -3.501607 | 0.294289  | -0.706527 |                    |           |           |           |
| H                                   | 2.791864  | -2.284875 | -0.485631 | H                  | -3.845944 | 0.065855  | 1.075961  |                    |           |           |           |
| H                                   | 2.892676  | 2.146819  | -0.734623 | H                  | -0.445951 | 3.024598  | -0.136338 |                    |           |           |           |
| H                                   | 2.671297  | 1.420404  | 0.867628  | H                  | -2.173037 | 2.682739  | -0.134403 |                    |           |           |           |
| H                                   | 1.463868  | 2.561752  | 0.232976  | H                  | -1.150725 | 2.026386  | -1.434809 |                    |           |           |           |
| N                                   | -2.238043 | -0.955069 | 0.554834  | N                  | 2.162200  | -1.609100 | -0.187330 |                    |           |           |           |
| H                                   | -2.088029 | -1.865194 | 0.990839  | H                  | 1.864905  | -2.559245 | 0.036892  |                    |           |           |           |
| H                                   | -2.859966 | -1.133189 | -0.233166 | H                  | 2.971414  | -1.431954 | 0.407315  |                    |           |           |           |
| H                                   | -2.795643 | -0.426907 | 1.226096  | H                  | 2.529232  | -1.651146 | -1.137794 |                    |           |           |           |
| H                                   | 0.610373  | -2.489848 | -0.712962 | H                  | -3.045611 | -1.992908 | 0.849837  |                    |           |           |           |
| N                                   | 0.170410  | 0.126421  | 2.081544  | N                  | -0.432776 | -0.921187 | -1.690586 |                    |           |           |           |
| H                                   | 0.963005  | 0.750016  | 2.236065  | H                  | -0.807055 | -0.177115 | -2.279463 |                    |           |           |           |
| H                                   | 0.452550  | -0.780522 | 2.456320  | H                  | -1.246093 | -1.446344 | -1.350524 |                    |           |           |           |
| H                                   | -0.564097 | 0.457309  | 2.707121  | H                  | 0.085458  | -1.543074 | -2.309402 |                    |           |           |           |
| N                                   | -0.760129 | -0.183659 | -2.099475 | N                  | 1.005530  | 0.109924  | 2.146447  |                    |           |           |           |
| H                                   | 0.086133  | 0.148737  | -2.566766 | H                  | 0.306950  | 0.760704  | 2.509294  |                    |           |           |           |
| H                                   | -1.520150 | 0.396647  | -2.453474 | H                  | 1.919631  | 0.514398  | 2.349812  |                    |           |           |           |

|                                       |           |           |           |                    |           |           |           |               |  |
|---------------------------------------|-----------|-----------|-----------|--------------------|-----------|-----------|-----------|---------------|--|
| H                                     | -0.945192 | -1.115408 | -2.469799 | H                  | 0.943715  | -0.737574 | 2.710485  |               |  |
| N                                     | -1.299658 | 1.878280  | 0.017091  | N                  | 1.906569  | 1.550842  | -0.874118 |               |  |
| H                                     | -0.874988 | 2.486600  | -0.684124 | H                  | 2.851283  | 1.287138  | -1.148238 |               |  |
| H                                     | -1.206227 | 2.378802  | 0.901069  | H                  | 2.007997  | 2.333498  | -0.229570 |               |  |
| H                                     | -2.298692 | 1.874103  | -0.190800 | H                  | 1.470976  | 1.940365  | -1.709034 |               |  |
| <b>Structure (TS<sub>8-9</sub>)</b>   |           |           |           |                    |           |           |           |               |  |
| E = -550.649102548                    |           |           |           | E = -550.612749067 |           |           |           | Not available |  |
| Ru                                    | 0.050546  | 0.237808  | 0.006434  | Ru                 | 0.834730  | -0.403447 | 0.076096  |               |  |
| C                                     | 2.578117  | -1.615620 | 0.108693  | C                  | -4.288629 | -0.083146 | -0.197337 |               |  |
| O                                     | 1.208017  | -1.442545 | 0.379771  | O                  | -2.939136 | -0.024275 | 0.149307  |               |  |
| H                                     | 3.123865  | -0.760670 | -0.269122 | H                  | -4.802806 | -1.019354 | -0.026477 |               |  |
| H                                     | 2.891090  | -2.630629 | -0.092642 | H                  | -4.646687 | 0.629911  | -0.927485 |               |  |
| H                                     | 1.979691  | -1.547607 | 1.268752  | H                  | -3.801823 | 0.437527  | 0.862398  |               |  |
| N                                     | -1.311463 | 1.803411  | -0.518300 | N                  | 2.114813  | -0.216116 | -1.639542 |               |  |
| H                                     | -1.969010 | 1.479439  | -1.228604 | H                  | 1.718032  | 0.458305  | -2.296146 |               |  |
| H                                     | -0.874612 | 2.636109  | -0.913383 | H                  | 2.219443  | -1.088644 | -2.158059 |               |  |
| H                                     | -1.887431 | 2.143622  | 0.251822  | H                  | 3.064151  | 0.100728  | -1.445483 |               |  |
| N                                     | 0.685877  | 0.134435  | -2.041787 | N                  | -0.506002 | -1.647064 | -1.048945 |               |  |
| H                                     | 1.503785  | -0.459360 | -2.185213 | H                  | -1.462137 | -1.525842 | -0.708508 |               |  |
| H                                     | 0.904402  | 1.014910  | -2.507085 | H                  | -0.297693 | -2.643825 | -0.995874 |               |  |
| H                                     | -0.060016 | -0.292493 | -2.593244 | H                  | -0.541092 | -1.419225 | -2.041956 |               |  |
| N                                     | -0.657173 | 0.192698  | 2.043001  | N                  | 2.169039  | 0.807112  | 1.253616  |               |  |
| H                                     | -0.206207 | 0.835478  | 2.693615  | H                  | 2.646531  | 0.275329  | 1.982023  |               |  |
| H                                     | -0.519375 | -0.738169 | 2.437934  | H                  | 1.679621  | 1.565162  | 1.729601  |               |  |
| H                                     | -1.657055 | 0.374628  | 2.131568  | H                  | 2.911456  | 1.260357  | 0.721877  |               |  |
| N                                     | 1.570474  | 1.649031  | 0.521557  | N                  | -0.320168 | -0.882146 | 1.823687  |               |  |
| H                                     | 1.212386  | 2.477257  | 0.997977  | H                  | -0.214920 | -1.859828 | 2.096274  |               |  |
| H                                     | 2.092538  | 2.005519  | -0.278908 | H                  | -1.310195 | -0.744558 | 1.603503  |               |  |
| H                                     | 2.274991  | 1.263357  | 1.151515  | H                  | -0.128015 | -0.335328 | 2.661637  |               |  |
| O                                     | -1.423618 | -1.206776 | -0.566675 | O                  | -0.553393 | 1.349918  | -0.414061 |               |  |
| C                                     | -2.749248 | -1.301011 | -0.009601 | C                  | -0.334023 | 2.768631  | -0.383911 |               |  |
| H                                     | -1.042415 | -2.092330 | -0.645299 | H                  | -1.503259 | 1.129843  | -0.375814 |               |  |
| H                                     | -3.155729 | -0.293714 | 0.031763  | H                  | 0.738643  | 2.933569  | -0.458193 |               |  |
| H                                     | -2.720784 | -1.732027 | 0.990108  | H                  | -0.705162 | 3.200773  | 0.543717  |               |  |
| H                                     | -3.376559 | -1.909546 | -0.655270 | H                  | -0.819832 | 3.246225  | -1.231444 |               |  |
| <b>Structure (TS<sub>10-11</sub>)</b> |           |           |           |                    |           |           |           |               |  |
| E = -550.68052046                     |           |           |           | Not available      |           |           |           | Not available |  |
| Ru                                    | 0.046869  | 0.279940  | -0.010481 |                    |           |           |           |               |  |
| H                                     | -0.833829 | -2.542296 | 0.747739  |                    |           |           |           |               |  |
| O                                     | 1.119567  | -1.203282 | -0.726682 |                    |           |           |           |               |  |
| C                                     | -1.131252 | -1.480905 | 0.703540  |                    |           |           |           |               |  |
| C                                     | 2.322219  | -1.744353 | -0.185443 |                    |           |           |           |               |  |
| O                                     | -2.365632 | -1.324197 | 0.046783  |                    |           |           |           |               |  |
| H                                     | 0.018639  | -1.527087 | -0.096253 |                    |           |           |           |               |  |
| H                                     | -1.181653 | -1.172533 | 1.752099  |                    |           |           |           |               |  |
| H                                     | 2.137650  | -2.222589 | 0.780327  |                    |           |           |           |               |  |
| H                                     | 3.078458  | -0.965005 | -0.075998 |                    |           |           |           |               |  |
| H                                     | 2.693295  | -2.498877 | -0.874744 |                    |           |           |           |               |  |
| N                                     | 1.180960  | 1.980319  | -0.759462 |                    |           |           |           |               |  |
| H                                     | 0.644372  | 2.678578  | -1.274506 |                    |           |           |           |               |  |
| H                                     | 1.863305  | 1.612691  | -1.426127 |                    |           |           |           |               |  |
| H                                     | 1.720468  | 2.499508  | -0.067376 |                    |           |           |           |               |  |
| N                                     | -0.970503 | 0.093408  | -1.855981 |                    |           |           |           |               |  |
| H                                     | -1.196042 | 0.932905  | -2.387229 |                    |           |           |           |               |  |
| H                                     | -1.845196 | -0.409697 | -1.678961 |                    |           |           |           |               |  |
| H                                     | -0.404828 | -0.499910 | -2.466753 |                    |           |           |           |               |  |
| N                                     | 1.139494  | 0.362243  | 1.848555  |                    |           |           |           |               |  |

|                                       |           |           |           |  |  |
|---------------------------------------|-----------|-----------|-----------|--|--|
| H                                     | 1.315573  | 1.304866  | 2.196357  |  |  |
| H                                     | 2.056302  | -0.077943 | 1.760045  |  |  |
| H                                     | 0.676422  | -0.128198 | 2.614857  |  |  |
| N                                     | -1.547445 | 1.468488  | 0.800085  |  |  |
| H                                     | -2.383450 | 0.877628  | 0.746131  |  |  |
| H                                     | -1.763009 | 2.310350  | 0.265330  |  |  |
| H                                     | -1.458801 | 1.772807  | 1.769185  |  |  |
| H                                     | -2.994738 | -2.022352 | 0.275246  |  |  |
| <b>Structure (TS<sub>12-13</sub>)</b> |           |           |           |  |  |
| E = -434.983342571                    |           |           |           |  |  |
| Ru                                    | -0.047238 | 0.059666  | -0.153606 |  |  |
| C                                     | 1.890085  | -0.516105 | 0.551972  |  |  |
| O                                     | 1.954734  | -0.239662 | -0.722657 |  |  |
| H                                     | 0.815669  | -0.472613 | -1.434746 |  |  |
| N                                     | 0.543762  | 2.094636  | 0.024314  |  |  |
| H                                     | 0.436605  | 2.525930  | 0.942920  |  |  |
| H                                     | 0.080426  | 2.724033  | -0.633391 |  |  |
| H                                     | 1.540206  | 2.147005  | -0.205486 |  |  |
| N                                     | -0.819851 | -0.245031 | 1.949564  |  |  |
| H                                     | -0.612798 | 0.552985  | 2.550563  |  |  |
| H                                     | -0.385073 | -1.042052 | 2.414205  |  |  |
| H                                     | -1.826596 | -0.392704 | 2.020444  |  |  |
| N                                     | -0.504517 | -2.026225 | -0.466217 |  |  |
| H                                     | 0.331309  | -2.579249 | -0.669797 |  |  |
| H                                     | -1.120197 | -2.181756 | -1.265031 |  |  |
| H                                     | -0.950078 | -2.487148 | 0.327642  |  |  |
| N                                     | -2.087130 | 0.584672  | -0.707087 |  |  |
| H                                     | -2.493708 | 1.354179  | -0.174076 |  |  |
| H                                     | -2.764513 | -0.176515 | -0.658721 |  |  |
| H                                     | -2.097527 | 0.891018  | -1.682246 |  |  |
| H                                     | 2.290467  | 0.229968  | 1.235091  |  |  |
| H                                     | 1.930046  | -1.560842 | 0.856721  |  |  |
| <b>Structure (TS<sub>13-14</sub>)</b> |           |           |           |  |  |
| E = -435.017372957                    |           |           |           |  |  |
| Ru                                    | -0.059191 | -0.005078 | -0.192115 |  |  |
| C                                     | 2.119033  | 0.049228  | 0.297092  |  |  |
| O                                     | 1.725518  | -0.782495 | -0.582277 |  |  |
| H                                     | -0.172234 | -0.017257 | -1.751347 |  |  |
| N                                     | 0.286934  | 2.109272  | -0.391157 |  |  |
| H                                     | 0.603136  | 2.598973  | 0.446126  |  |  |
| H                                     | -0.531704 | 2.619656  | -0.724746 |  |  |
| H                                     | 0.995817  | 2.271633  | -1.109247 |  |  |
| N                                     | -0.329725 | 0.020611  | 2.122285  |  |  |
| H                                     | 0.008668  | 0.869087  | 2.575538  |  |  |
| H                                     | 0.176521  | -0.743574 | 2.571111  |  |  |
| H                                     | -1.294067 | -0.084198 | 2.438091  |  |  |
| N                                     | -0.564804 | -2.070568 | -0.301686 |  |  |
| H                                     | 0.314709  | -2.563952 | -0.471771 |  |  |
| H                                     | -1.156358 | -2.287996 | -1.104191 |  |  |
| H                                     | -0.993231 | -2.508577 | 0.513692  |  |  |
| N                                     | -2.132660 | 0.468453  | -0.324556 |  |  |
| H                                     | -2.435312 | 1.232257  | 0.281638  |  |  |
| H                                     | -2.732523 | -0.325736 | -0.095235 |  |  |
| H                                     | -2.385913 | 0.732187  | -1.278520 |  |  |
| H                                     | 2.572439  | 0.990377  | -0.015441 |  |  |
| H                                     | 2.297908  | -0.289238 | 1.318815  |  |  |

| <b>Structure (TS<sub>14-1</sub>)</b>  |           |           |           |
|---------------------------------------|-----------|-----------|-----------|
| E = -435.042584313                    |           |           |           |
| Ru                                    | -0.029634 | 0.000039  | -0.111517 |
| O                                     | 1.707619  | 0.000611  | 0.726173  |
| C                                     | 2.067268  | 0.000742  | -0.541607 |
| H                                     | 2.475126  | 0.921595  | -0.956390 |
| H                                     | 0.717860  | 0.000174  | -1.543604 |
| H                                     | 2.475695  | -0.919823 | -0.956438 |
| N                                     | 0.021218  | 2.130628  | -0.130526 |
| H                                     | -0.805757 | 2.605755  | 0.232123  |
| H                                     | 0.203120  | 2.530505  | -1.051969 |
| H                                     | 0.797635  | 2.425774  | 0.467317  |
| N                                     | -1.019699 | -0.000460 | 1.876773  |
| H                                     | -1.593773 | 0.810188  | 2.107244  |
| H                                     | -0.257434 | 0.000034  | 2.558064  |
| H                                     | -1.592733 | -0.811858 | 2.107241  |
| N                                     | 0.023088  | -2.130592 | -0.130551 |
| H                                     | 0.801362  | -2.425012 | 0.465219  |
| H                                     | 0.202877  | -2.530420 | -1.052418 |
| H                                     | -0.802431 | -2.606436 | 0.234418  |
| N                                     | -1.951921 | -0.000791 | -1.096153 |
| H                                     | -2.762039 | 0.001533  | -0.476151 |
| H                                     | -2.065269 | -0.808568 | -1.710132 |
| H                                     | -2.063707 | 0.804015  | -1.714320 |
| <b>Structure (TS<sub>14-15</sub>)</b> |           |           |           |
| E = -435.031721966                    |           |           |           |
| Ru                                    | -0.121316 | 0.015766  | -0.160728 |
| O                                     | 1.834728  | -0.143544 | 0.522418  |
| C                                     | 2.486340  | 0.126082  | -0.498400 |
| H                                     | 2.423252  | 1.109960  | -0.969946 |
| H                                     | 0.272212  | 0.163971  | -1.691129 |
| H                                     | 3.200030  | -0.598367 | -0.901561 |
| N                                     | -0.082511 | 2.145440  | -0.055272 |
| H                                     | -0.914575 | 2.584166  | 0.340574  |
| H                                     | 0.063639  | 2.572531  | -0.970162 |
| H                                     | 0.692654  | 2.459271  | 0.532990  |
| N                                     | -0.638427 | -0.183288 | 2.068326  |
| H                                     | -1.209747 | 0.550832  | 2.484633  |
| H                                     | 0.247241  | -0.166539 | 2.576375  |
| H                                     | -1.086419 | -1.057623 | 2.339892  |
| N                                     | -0.067897 | -2.109487 | -0.343145 |
| H                                     | 0.798404  | -2.443657 | 0.083977  |
| H                                     | -0.043966 | -2.430726 | -1.311493 |
| H                                     | -0.822125 | -2.621337 | 0.114445  |
| N                                     | -2.125142 | 0.060116  | -0.800711 |
| H                                     | -2.808578 | -0.143694 | -0.070950 |
| H                                     | -2.281159 | -0.624052 | -1.543526 |
| H                                     | -2.390984 | 0.953950  | -1.215406 |

**Table S4.** MN15 Spin contamination for the studied species.

| Structure      | Fe-species |        |        | Ru-species          |        |
|----------------|------------|--------|--------|---------------------|--------|
|                | S=1/2      | S=3/2  | S=5/2  | S=1/2               | S=3/2  |
| <b>1</b>       | 0.3560     | 0.0055 | 0.0021 | 0.0101              | 0.0022 |
| <b>2</b>       | 0.3980     | 0.0050 | 0.0021 | 0.0056              | 0.0017 |
| <b>3</b>       | 0.1944     | 0.0229 |        | 0.0056              | 0.0013 |
| <b>4</b>       |            | 0.0779 | 0.0631 | 0.0033              | 0.0047 |
| <b>5</b>       |            | 0.1321 | 0.0582 | 0.4192 <sup>a</sup> | 0.0038 |
| <b>6</b>       | 0.4174     | 0.2381 | 0.0020 | 0.0021              | 0.0020 |
| <b>7</b>       | 0.0603     | 0.0046 | 0.0018 | 0.0042              | 0.0016 |
| <b>8</b>       | 0.4139     | 0.2361 | 0.0018 | 0.0021              | 0.0020 |
| <b>9</b>       |            |        |        | 0.0038              | 0.0019 |
| <b>10</b>      | 0.3554     | 0.0049 |        | 0.0024              |        |
| <b>11</b>      | 0.1704     | 0.0867 |        | 0.0054              |        |
| <b>12</b>      |            |        |        | 0.0101              |        |
| <b>13</b>      |            |        |        | 0.0030              |        |
| <b>14</b>      |            |        |        | 0.0040              |        |
| <b>15</b>      |            |        |        | 0.0040              |        |
| <b>16</b>      |            |        |        | 0.0074              |        |
| <b>TS2-3</b>   | 0.1434     | 0.0094 |        | 0.0059              | 0.0014 |
| <b>TS4-5</b>   |            | 0.0464 | 0.0641 | 0.0154              | 0.0067 |
| <b>TS5-1</b>   | 0.0299     | 0.1051 | 0.0078 | 0.0030              | 0.0048 |
| <b>TS2-6</b>   | 0.4220     | 0.2137 | 0.0023 | 0.0037              | 0.0028 |
| <b>TS7-8</b>   | 0.3707     | 0.2143 | 0.0022 | 0.0040              | 0.0024 |
| <b>TS8-9</b>   | 0.1675     | 0.0045 | 0.0018 | 0.0041              | 0.0025 |
| <b>TS10-11</b> | 0.1363     | 0.0285 |        | 0.0050              |        |
| <b>TS12-13</b> |            |        |        | 0.0028              |        |
| <b>TS13-14</b> |            |        |        | 0.0091              |        |
| <b>TS14-1</b>  |            |        |        | 0.0076              |        |
| <b>TS14-15</b> |            |        |        | 0.0091              |        |

<sup>a</sup> This is the only structure with high spin contamination. See Table S5 and its footnote a.

**Table S5.** CASSCF leading coefficients and spin-orbit corrections for the studied Ru-species. The CASSCF active space was 11 electrons in 8 orbitals corresponding largely to the d-orbitals of the metal and the 2p orbitals of oxygen. The spin-orbit corrections ( $\Delta E_{\text{SO}}$  in kcal/mol) were obtained by diagonalizing the Breit-Pauli Hamiltonian using four doublet and two quartet states as basis.

| Structure      | S=1/2               | S=3/2  | $\Delta E_{\text{SO}}$ |
|----------------|---------------------|--------|------------------------|
| <b>1</b>       | 0.9532              | 0.9708 | -0.46                  |
| <b>2</b>       | 0.9676              | 0.7718 | -0.43                  |
| <b>3</b>       | 0.9695              | 0.9693 | -1.21                  |
| <b>4</b>       | 0.9566              | 0.8758 | -0.44                  |
| <b>5</b>       | 0.7684 <sup>a</sup> | 0.9431 | -0.02                  |
| <b>6</b>       | 0.9890              | 0.9297 | -0.72                  |
| <b>7</b>       | 0.9720              | 0.8398 | -0.43                  |
| <b>8</b>       | 0.9888              | 0.9115 | -0.56                  |
| <b>9</b>       | 0.9736              | 0.9708 | -0.46                  |
| <b>10</b>      | 0.9705              | 0.8828 | -0.42                  |
| <b>11</b>      | 0.9719              | 0.9738 | -0.83                  |
| <b>12</b>      | 0.9675              | 0.9624 | -0.51                  |
| <b>13</b>      | 0.9510              | 0.9555 | -0.32                  |
| <b>14</b>      | 0.9623              | 0.9679 | -0.29                  |
| <b>15</b>      | 0.9767              | 0.9788 | -1.66                  |
| <b>16</b>      | 0.9694              | 0.9713 | -0.98                  |
| <b>TS2-3</b>   | 0.9800              | 0.9865 | -0.58                  |
| <b>TS4-5</b>   | 0.9234              | 0.9310 | -0.76                  |
| <b>TS5-1</b>   | 0.9226              | 0.9460 | -0.12                  |
| <b>TS2-6</b>   | 0.9805              | 0.9434 | -0.69                  |
| <b>TS7-8</b>   | 0.8995              | 0.8668 | -0.44                  |
| <b>TS8-9</b>   | 0.9787              | 0.9212 | -0.54                  |
| <b>TS10-11</b> | 0.9792              | 0.9850 | -0.55                  |
| <b>TS12-13</b> | 0.9566              | 0.9346 | -0.32                  |
| <b>TS13-14</b> | 0.9478              | 0.9415 | -0.35                  |
| <b>TS14-1</b>  | 0.9705              | 0.9757 | -0.34                  |
| <b>TS14-15</b> | 0.9736              | 0.9788 | -1.39                  |

<sup>a</sup> This is the only multi-reference case for the S=1/2 state and corresponds to  $(\text{NH}_3)_4\text{Ru}(\text{O})\text{CH}_3$  (S=1/2) and  $\text{O}_2$  (S=1). The three involved electronic configurations are:  $0.77 \uparrow\downarrow - 0.38 \downarrow\downarrow - 0.38 \downarrow\uparrow$  (the first electron is localized on Ru and the other two to  $\text{O}_2$ ). The corresponding quartet is dominated by the corresponding  $\uparrow\uparrow\uparrow$  and is quasi-degenerate with the doublet. Despite the high spin contamination (see Table S4), the MN15 energies for the two states are practically the same (see Figure 8 of the manuscript).
